# Supplementary material
Source: PubMed Central journal article supplement (PMC5500790)
Supplement: 10.1074_M117.786269_jbc.M117.786269-1.pdf [file 10.1074_M117.786269_jbc.M117.786269-1.pdf]

## Supplemental Data

Table S1. UniProt accession numbers, sequence ranges and lengths used in model building.

| UniProt accession | Protein            | Sequence range used | Length |
|-------------------|--------------------|---------------------|--------|
| P28026            | XWnt8 <sup>a</sup> | 32-338              | 307    |
| P04628            | hWnt1              | 70-370              | 301    |
| P09544            | hWnt2              | 53-349              | 297    |
| Q93097            | hWnt2b             | 84-380              | 297    |
| P56703            | hWnt3              | 57-355              | 299    |
| P56704            | hWnt3a             | 54-352              | 299    |
| P56705            | hWnt4              | 55-351              | 297    |
| P41221            | hWnt5a             | 81-380              | 300    |
| Q9H1J7            | hWnt5b             | 62-359              | 298    |
| Q9Y6F9            | hWnt6              | 53-365              | 313    |
| O00755            | hWnt7a             | 50-349              | 300    |
| P56706            | hWnt7b             | 50-349              | 300    |
| Q9H1J5            | hWnt8a             | 31-337              | 307    |
| Q93098            | hWnt8b             | 31-334              | 304    |
| O14904            | hWnt9a             | 70-364              | 295    |
| O14905            | hWnt9b             | 66-356              | 291    |
| Q9GZT5            | hWnt10a            | 73-417              | 345    |
| O00744            | hWnt10b            | 60-389              | 330    |
| O96014            | hWnt11             | 57-354              | 298    |
| Q9UBV4            | hWnt16             | 58-365              | 308    |
| P04426            | mWnt1              | 70-370              | 301    |
| P21552            | mWnt2              | 53-349              | 297    |
| O70283            | mWnt2b             | 82-378              | 297    |
| P17553            | mWnt3              | 57-355              | 299    |
| P27467            | mWnt3a             | 54-352              | 299    |
| P22724            | mWnt4              | 55-351              | 297    |
| P22725            | mWnt5a             | 81-380              | 300    |
| P22726            | mWnt5b             | 60-358              | 299    |
| P22727            | mWnt6              | 52-364              | 313    |
| P24383            | mWnt7a             | 50-349              | 300    |
| P28047            | mWnt7b             | 50-349              | 300    |
| Q64527            | mWnt8a             | 31-337              | 307    |
| Q9WUD6            | mWnt8b             | 30-333              | 304    |
| Q8R5M2            | mWnt9a             | 70-364              | 295    |
| O35468            | mWnt9b             | 68-358              | 291    |
| P70701            | mWnt10a            | 73-417              | 345    |
| P48614            | mWnt10b            | 60-389              | 330    |
| P48615            | mWnt11             | 57-354              | 298    |
| Q9QYS1            | mWnt16             | 60-364              | 305    |
| Q9UP38            | hFzd1              | 116-230             | 115    |
| Q14332            | hFzd2              | 39-153              | 115    |
| Q9NPG1            | hFzd3              | 28-136              | 109    |
| Q9ULV1            | hFzd4              | 45-161              | 117    |
| Q13467            | hFzd5              | 33-150              | 118    |
| O60353            | hFzd6              | 24-132              | 109    |
| O75084            | hFzd7              | 49-163              | 115    |
| Q9H461            | hFzd8              | 35-151              | 117    |

|        |                    |         |     |
|--------|--------------------|---------|-----|
| O00144 | hFzd9              | 39-155  | 117 |
| Q9ULW2 | hFzd10             | 34-150  | 117 |
| Q8N474 | hSFRP1             | 58-169  | 112 |
| Q96HF1 | hSFRP2             | 40-155  | 116 |
| Q92765 | hSFRP3             | 35-150  | 116 |
| Q6FHJ7 | hSFRP4             | 24-139  | 116 |
| Q5T4F7 | hSFRP5             | 53-165  | 113 |
| O70421 | mFzd1              | 111-225 | 115 |
| Q9JIP6 | mFzd2              | 44-158  | 115 |
| Q61086 | mFzd3              | 28-136  | 109 |
| Q61088 | mFzd4              | 45-161  | 117 |
| Q9EQD0 | mFzd5              | 33-150  | 118 |
| Q61089 | mFzd6              | 24-132  | 109 |
| Q61090 | mFzd7              | 49-163  | 115 |
| Q61091 | mFzd8 <sup>b</sup> | 35-151  | 117 |
| Q9R216 | mFzd9              | 40-156  | 117 |
| Q8BKG4 | mFzd10             | 35-151  | 117 |
| Q8C4U3 | mSFRP1             | 58-169  | 112 |
| P97299 | mSFRP2             | 40-155  | 116 |
| P97401 | mSFRP3             | 35-150  | 116 |
| Q9Z1N6 | mSFRP4             | 24-139  | 116 |
| Q9WU66 | mSFRP5             | 50-162  | 113 |

---

<sup>a</sup>Template for all Wnt structures; sequence range corresponds to N- and C-terminal limits available in PDB 4FOA chain B. <sup>b</sup>Template for all Fzd CRD structures; sequence range corresponds to N- and C-terminal limits available in PDB 4FOA chain A.

Figure S2. Sequence alignments of Wnts to XWnt8 (PDB 4FOA chain B) (NOTE: continues over multiple pages).<sup>a</sup>

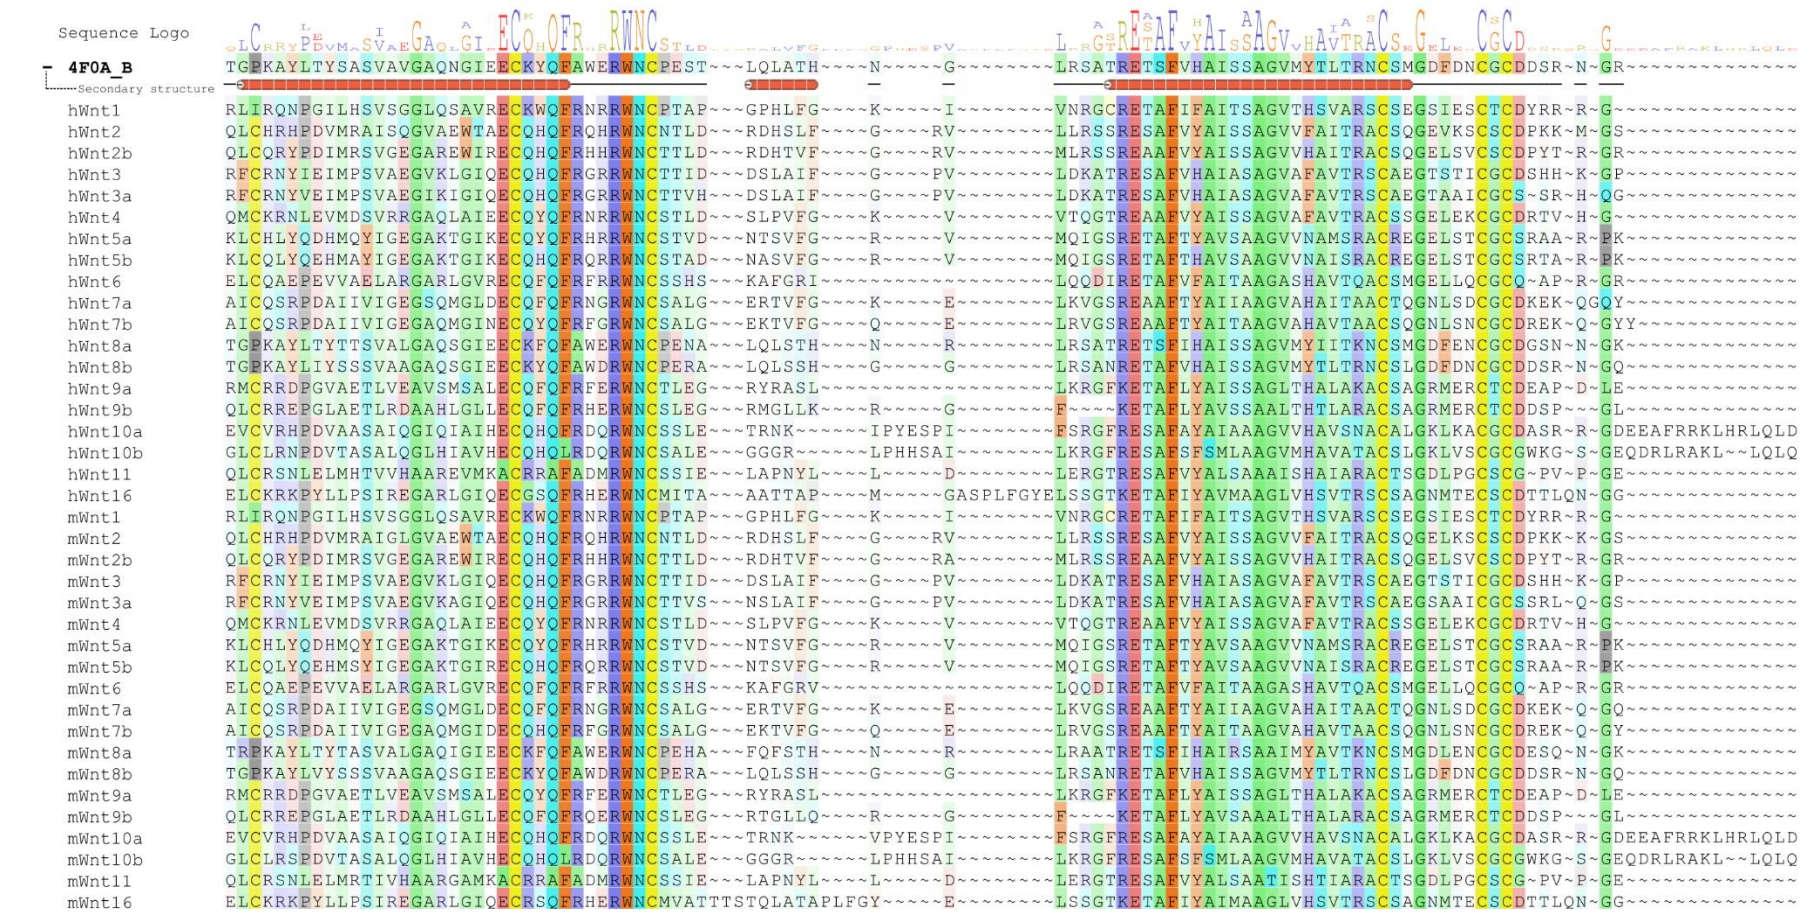

Sequence Logo

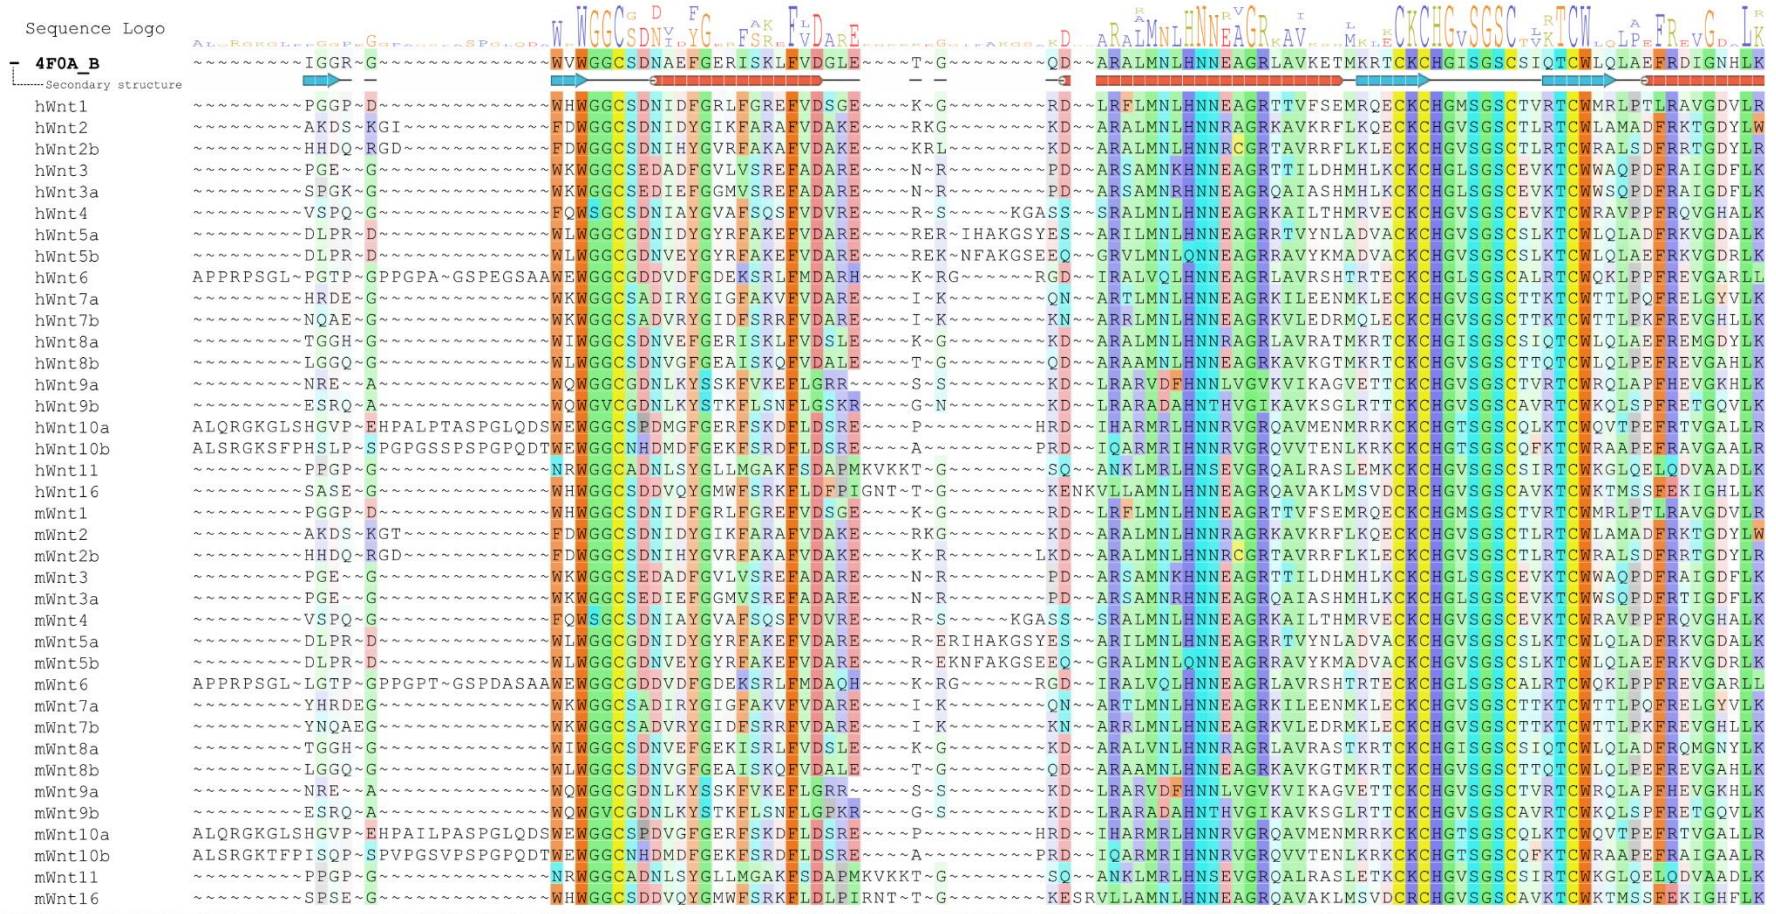

Sequence Logo

4FOA\_B

Secondary structure

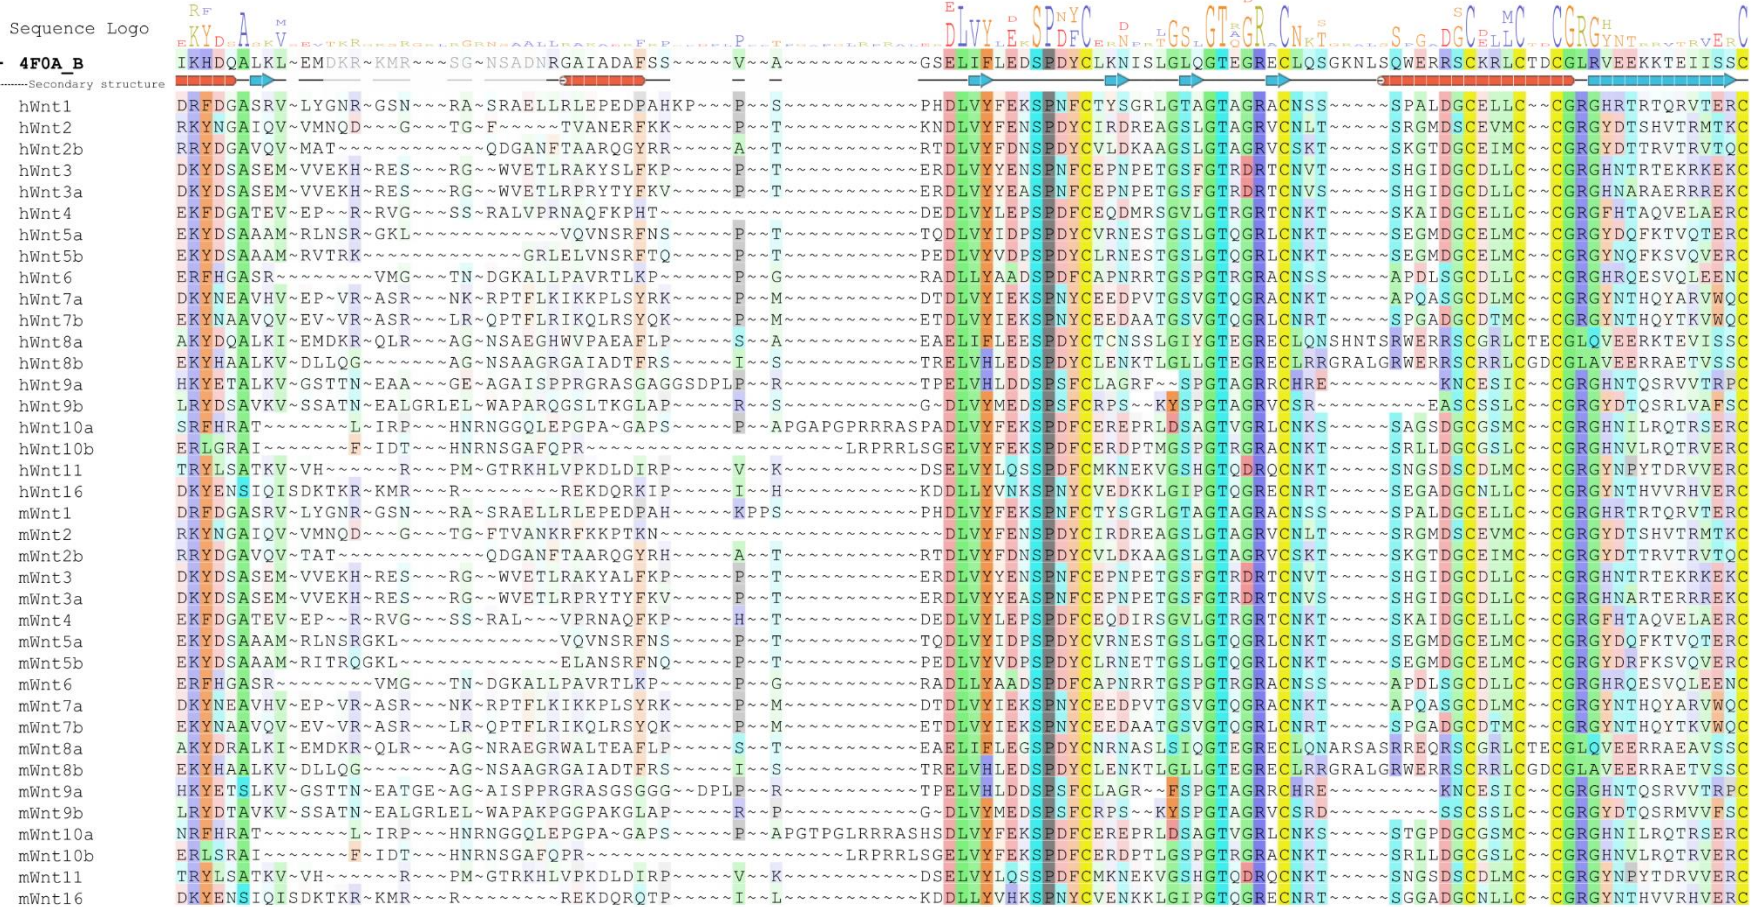

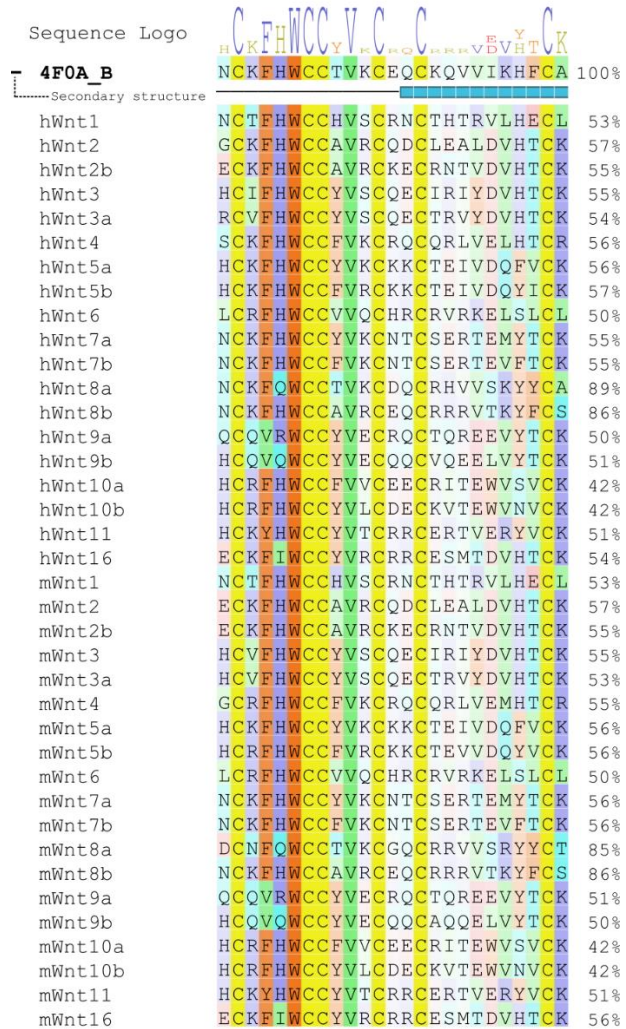

<sup>a</sup>Sequence logo and intensity of position colouring indicates level of conservation. Percentage similarity to mFzd8 sequence contained in PDB 4FOA chain A shown at end of sequences.

Figure S3. Sequence alignments of Fzd and SFRP CRDS to mFzd8 (PDB 4FOA chain A).<sup>a</sup>

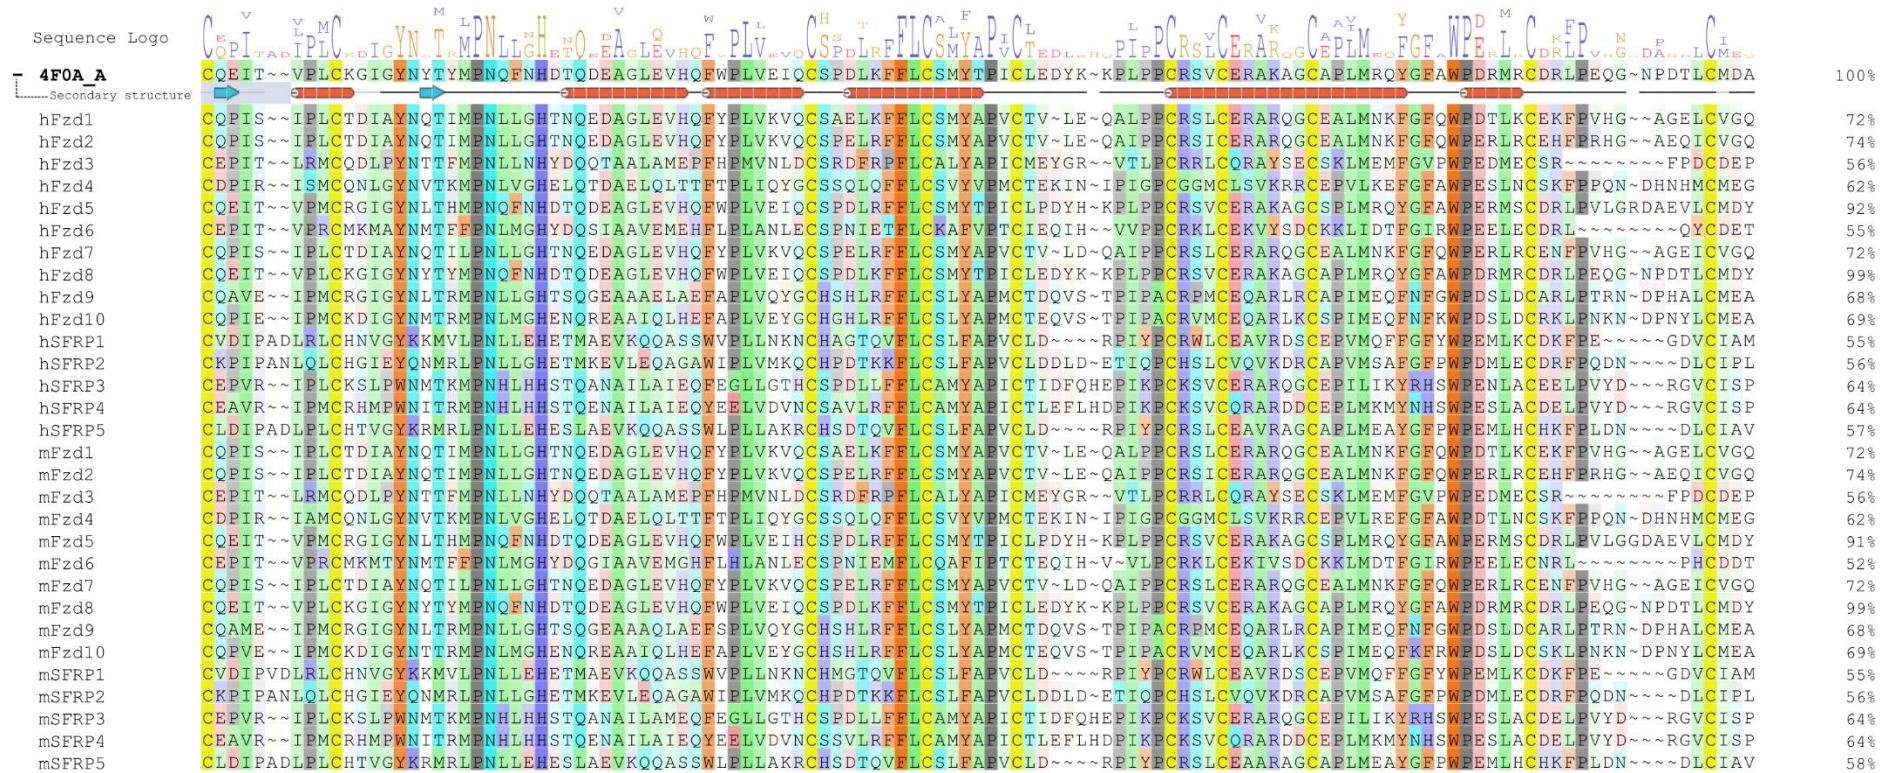

<sup>a</sup>Sequence logo and intensity of position colouring indicates level of conservation. Percentage similarity to mFzd8 sequence contained in PDB 4FOA chain A shown at end of sequences.

Figure S4. KNIME workflow of complex refinement process.<sup>a</sup>

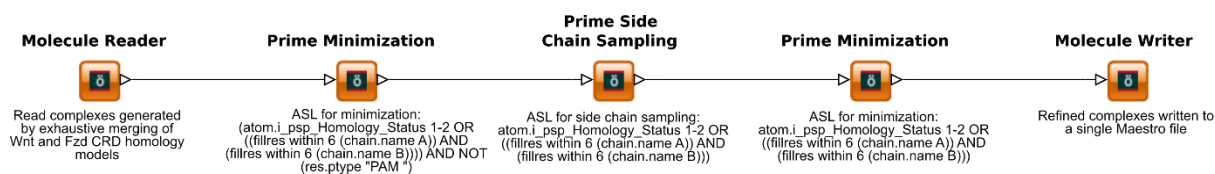

<sup>a</sup>Complex refinement achieved using Prime (Schrodinger) and automated by KNIME. ASL refers to Atom Specification Language used by Schrodinger software to define chemical selections. ASL selections for each of the Prime steps are specified under each node. In all complexes, chain A is a Fzd CRD and chain B is a Wnt. The residue name PAM is ascribed to the lipid portion of *O*-palmitoleylserine.



Table S5. MolProbity Scores for mouse complexes.

|              |    | <b>mWnt</b> |      |      |      |      |      |      |      |      |      |      |      |      |      |      |      |      |      |      |
|--------------|----|-------------|------|------|------|------|------|------|------|------|------|------|------|------|------|------|------|------|------|------|
|              |    | 1           | 2    | 2b   | 3    | 3a   | 4    | 5    | 5b   | 6    | 7a   | 7b   | 8a   | 8b   | 9a   | 9b   | 10a  | 10b  | 11   | 16   |
| <b>mFzd</b>  | 1  | 2.00        | 2.09 | 2.49 | 1.90 | 1.88 | 1.97 | 2.14 | 1.84 | 2.03 | 2.03 | 2.03 | 2.08 | 1.94 | 2.14 | 1.92 | 2.34 | 2.11 | 1.78 | 2.64 |
|              | 2  | 2.13        | 2.20 | 2.52 | 1.94 | 1.87 | 1.97 | 1.93 | 1.92 | 2.08 | 1.91 | 2.01 | 2.10 | 1.78 | 2.33 | 2.14 | 2.28 | 1.99 | 1.80 | 2.64 |
|              | 3  | 2.12        | 2.20 | 2.63 | 1.98 | 2.02 | 1.99 | 1.89 | 2.09 | 1.89 | 1.95 | 2.03 | 2.28 | 2.08 | 2.44 | 2.14 | 2.14 | 2.13 | 1.91 | 2.64 |
|              | 4  | 2.12        | 2.16 | 2.49 | 2.06 | 2.04 | 1.99 | 1.77 | 1.84 | 2.03 | 2.09 | 2.24 | 2.33 | 2.17 | 2.36 | 2.14 | 2.36 | 2.16 | 1.87 | 2.59 |
|              | 5  | 2.07        | 2.18 | 2.49 | 2.16 | 2.02 | 1.78 | 2.13 | 1.81 | 2.01 | 1.90 | 2.05 | 2.07 | 1.89 | 2.28 | 2.04 | 2.27 | 1.93 | 1.90 | 2.63 |
|              | 6  | 2.27        | 2.39 | 2.44 | 2.44 | 2.12 | 2.08 | 2.29 | 2.26 | 2.11 | 2.19 | 2.27 | 2.46 | 2.30 | 2.43 | 2.26 | 2.30 | 2.27 | 1.96 | 2.75 |
|              | 7  | 2.00        | 2.21 | 2.53 | 2.24 | 1.89 | 1.79 | 2.08 | 2.04 | 1.88 | 1.69 | 1.92 | 2.23 | 1.91 | 2.34 | 2.01 | 2.29 | 2.03 | 1.95 | 2.64 |
|              | 8  | 2.05        | 2.03 | 2.44 | 2.02 | 2.00 | 1.73 | 1.94 | 1.63 | 1.81 | 1.81 | 1.91 | 1.99 | 1.85 | 2.17 | 2.06 | 2.33 | 2.01 | 1.77 | 2.53 |
|              | 9  | 2.11        | 1.91 | 2.54 | 2.14 | 1.99 | 1.94 | 1.90 | 1.80 | 1.95 | 1.88 | 2.10 | 2.27 | 1.96 | 2.10 | 2.10 | 2.39 | 2.13 | 1.99 | 2.63 |
|              | 10 | 2.00        | 2.28 | 2.54 | 1.99 | 1.96 | 1.85 | 1.88 | 1.82 | 2.08 | 1.93 | 1.98 | 2.25 | 2.04 | 2.26 | 2.07 | 2.08 | 2.17 | 1.87 | 2.68 |
| <b>mSFRP</b> | 1  | 2.14        | 2.22 | 2.78 | 2.28 | 1.98 | 1.89 | 1.88 | 1.96 | 2.02 | 2.08 | 2.10 | 2.36 | 2.19 | 2.42 | 2.19 | 2.25 | 2.25 | 1.95 | 2.64 |
|              | 2  | 2.11        | 2.26 | 2.77 | 2.19 | 2.08 | 2.14 | 2.15 | 2.13 | 2.30 | 2.08 | 2.15 | 2.24 | 2.11 | 2.32 | 2.28 | 2.31 | 2.25 | 2.09 | 2.73 |
|              | 3  | 1.84        | 2.46 | 2.46 | 1.97 | 1.89 | 2.02 | 1.98 | 1.94 | 1.83 | 1.92 | 2.08 | 2.27 | 1.97 | 2.35 | 2.24 | 2.25 | 2.13 | 1.97 | 2.75 |
|              | 4  | 2.05        | 1.97 | 2.62 | 2.02 | 1.98 | 1.98 | 2.01 | 2.01 | 2.06 | 1.89 | 1.96 | 2.15 | 1.89 | 2.29 | 2.15 | 2.22 | 2.28 | 1.71 | 2.62 |
|              | 5  | 2.13        | 2.30 | 2.74 | 1.94 | 2.01 | 1.84 | 1.99 | 1.90 | 2.08 | 2.07 | 2.09 | 2.16 | 2.05 | 2.38 | 2.28 | 2.23 | 2.13 | 2.22 | 2.75 |

Table S6. MolProbity Scores for human complexes.

|              |    | <b>hWnt</b> |      |      |      |      |      |      |      |      |      |      |      |      |      |      |      |      |      |      |
|--------------|----|-------------|------|------|------|------|------|------|------|------|------|------|------|------|------|------|------|------|------|------|
|              |    | 1           | 2    | 2b   | 3    | 3a   | 4    | 5a   | 5b   | 6    | 7a   | 7b   | 8a   | 8b   | 9a   | 9b   | 10a  | 10b  | 11   | 16   |
| <b>hFzd</b>  | 1  | 2.13        | 1.88 | 2.45 | 1.91 | 2.00 | 1.75 | 2.14 | 1.69 | 2.12 | 2.03 | 1.96 | 2.06 | 2.01 | 2.28 | 2.06 | 2.30 | 2.20 | 1.72 | 2.11 |
|              | 2  | 1.92        | 2.02 | 2.24 | 1.81 | 2.01 | 1.73 | 1.93 | 1.60 | 2.03 | 1.91 | 1.94 | 2.08 | 1.74 | 2.31 | 2.18 | 2.20 | 2.15 | 1.75 | 2.20 |
|              | 3  | 2.14        | 1.98 | 2.69 | 2.22 | 2.11 | 2.01 | 1.89 | 1.94 | 2.29 | 1.95 | 1.95 | 2.14 | 2.01 | 2.42 | 2.22 | 2.27 | 2.31 | 2.03 | 2.21 |
|              | 4  | 2.09        | 1.95 | 2.75 | 1.82 | 2.04 | 1.96 | 1.86 | 1.92 | 2.05 | 2.12 | 2.05 | 2.23 | 2.15 | 2.33 | 2.06 | 2.36 | 2.13 | 1.96 | 2.19 |
|              | 5  | 2.02        | 1.88 | 2.52 | 1.84 | 1.94 | 1.82 | 1.77 | 1.72 | 2.05 | 1.90 | 1.88 | 2.01 | 1.98 | 2.25 | 2.06 | 2.39 | 2.23 | 1.99 | 2.13 |
|              | 6  | 2.04        | 2.01 | 2.62 | 2.11 | 2.22 | 1.85 | 1.73 | 2.07 | 2.16 | 1.99 | 1.97 | 2.00 | 2.10 | 2.41 | 2.17 | 2.19 | 2.16 | 1.89 | 2.16 |
|              | 7  | 1.95        | 1.80 | 2.44 | 1.88 | 2.01 | 1.78 | 2.08 | 1.97 | 2.22 | 1.69 | 1.90 | 2.11 | 1.87 | 2.25 | 2.21 | 2.15 | 2.18 | 1.78 | 2.17 |
|              | 8  | 1.74        | 1.74 | 2.43 | 1.74 | 1.97 | 1.52 | 1.94 | 1.70 | 2.00 | 1.81 | 1.82 | 1.92 | 1.92 | 2.27 | 2.03 | 2.11 | 2.14 | 1.49 | 2.21 |
|              | 9  | 1.98        | 1.99 | 2.26 | 1.88 | 2.22 | 1.78 | 1.67 | 1.86 | 1.99 | 1.93 | 2.03 | 2.04 | 2.05 | 2.27 | 1.97 | 2.25 | 2.03 | 1.79 | 2.32 |
|              | 10 | 2.07        | 1.75 | 2.54 | 2.02 | 2.03 | 1.60 | 1.92 | 1.80 | 1.98 | 2.03 | 2.05 | 2.16 | 2.02 | 2.31 | 1.99 | 2.05 | 2.26 | 1.79 | 2.20 |
| <b>hSFRP</b> | 1  | 2.18        | 1.97 | 2.69 | 2.29 | 2.20 | 1.94 | 1.94 | 1.96 | 2.17 | 1.99 | 2.15 | 2.26 | 2.17 | 2.28 | 2.24 | 2.26 | 2.18 | 2.05 | 2.26 |
|              | 2  | 2.11        | 2.08 | 2.65 | 2.20 | 2.16 | 1.93 | 2.15 | 2.02 | 2.30 | 2.08 | 2.13 | 2.37 | 2.26 | 2.48 | 2.23 | 2.32 | 2.27 | 2.18 | 2.49 |
|              | 3  | 2.09        | 1.97 | 2.52 | 2.11 | 2.13 | 1.92 | 1.87 | 2.08 | 2.18 | 2.02 | 2.07 | 2.26 | 2.13 | 2.49 | 2.21 | 2.22 | 2.27 | 1.92 | 2.29 |
|              | 4  | 2.02        | 2.06 | 2.62 | 1.90 | 1.99 | 1.77 | 2.04 | 1.76 | 2.11 | 1.77 | 2.08 | 2.14 | 2.04 | 2.24 | 2.22 | 2.18 | 2.10 | 1.88 | 2.17 |
|              | 5  | 2.28        | 1.91 | 2.66 | 1.86 | 1.96 | 1.87 | 2.13 | 2.02 | 2.17 | 2.11 | 2.17 | 2.35 | 2.17 | 2.26 | 2.14 | 2.23 | 2.17 | 2.08 | 2.33 |

Table S7. TM-Scores for mouse complexes with respect to the XWnt8-mFzd8 CRD complex (PDB 4F0A).

|              |    | <b>mWnt</b> |      |      |      |      |      |      |      |      |      |      |      |      |      |      |      |      |      |      |
|--------------|----|-------------|------|------|------|------|------|------|------|------|------|------|------|------|------|------|------|------|------|------|
|              |    | 1           | 2    | 2b   | 3    | 3a   | 4    | 5    | 5b   | 6    | 7a   | 7b   | 8a   | 8b   | 9a   | 9b   | 10a  | 10b  | 11   | 16   |
| <b>mFzd</b>  | 1  | 0.91        | 0.90 | 0.93 | 0.92 | 0.92 | 0.92 | 0.89 | 0.92 | 0.90 | 0.90 | 0.92 | 0.92 | 0.95 | 0.89 | 0.88 | 0.93 | 0.91 | 0.92 | 0.91 |
|              | 2  | 0.92        | 0.90 | 0.93 | 0.92 | 0.92 | 0.92 | 0.90 | 0.92 | 0.90 | 0.90 | 0.92 | 0.87 | 0.95 | 0.89 | 0.88 | 0.92 | 0.92 | 0.93 | 0.91 |
|              | 3  | 0.89        | 0.89 | 0.91 | 0.88 | 0.91 | 0.91 | 0.88 | 0.91 | 0.88 | 0.87 | 0.91 | 0.89 | 0.93 | 0.87 | 0.86 | 0.91 | 0.91 | 0.90 | 0.90 |
|              | 4  | 0.92        | 0.91 | 0.93 | 0.92 | 0.93 | 0.92 | 0.90 | 0.93 | 0.90 | 0.90 | 0.93 | 0.92 | 0.96 | 0.89 | 0.89 | 0.92 | 0.92 | 0.93 | 0.93 |
|              | 5  | 0.91        | 0.91 | 0.93 | 0.93 | 0.90 | 0.93 | 0.90 | 0.91 | 0.88 | 0.91 | 0.93 | 0.92 | 0.95 | 0.89 | 0.88 | 0.93 | 0.93 | 0.93 | 0.92 |
|              | 6  | 0.87        | 0.89 | 0.92 | 0.91 | 0.91 | 0.91 | 0.88 | 0.91 | 0.88 | 0.88 | 0.91 | 0.89 | 0.94 | 0.87 | 0.87 | 0.91 | 0.91 | 0.90 | 0.90 |
|              | 7  | 0.91        | 0.91 | 0.92 | 0.93 | 0.92 | 0.89 | 0.89 | 0.90 | 0.90 | 0.90 | 0.92 | 0.91 | 0.96 | 0.87 | 0.88 | 0.92 | 0.91 | 0.91 | 0.91 |
|              | 8  | 0.92        | 0.91 | 0.94 | 0.93 | 0.93 | 0.93 | 0.91 | 0.93 | 0.91 | 0.91 | 0.93 | 0.91 | 0.96 | 0.89 | 0.88 | 0.93 | 0.93 | 0.93 | 0.92 |
|              | 9  | 0.91        | 0.89 | 0.93 | 0.93 | 0.94 | 0.92 | 0.90 | 0.93 | 0.90 | 0.91 | 0.93 | 0.91 | 0.95 | 0.90 | 0.88 | 0.93 | 0.93 | 0.92 | 0.92 |
|              | 10 | 0.92        | 0.91 | 0.93 | 0.93 | 0.93 | 0.92 | 0.90 | 0.93 | 0.91 | 0.90 | 0.93 | 0.91 | 0.95 | 0.90 | 0.88 | 0.93 | 0.92 | 0.92 | 0.92 |
| <b>mSFRP</b> | 1  | 0.89        | 0.89 | 0.91 | 0.91 | 0.91 | 0.90 | 0.88 | 0.89 | 0.89 | 0.89 | 0.90 | 0.89 | 0.92 | 0.85 | 0.83 | 0.89 | 0.91 | 0.88 | 0.87 |
|              | 2  | 0.91        | 0.91 | 0.93 | 0.92 | 0.93 | 0.92 | 0.87 | 0.92 | 0.87 | 0.88 | 0.91 | 0.91 | 0.95 | 0.89 | 0.88 | 0.90 | 0.93 | 0.92 | 0.89 |
|              | 3  | 0.89        | 0.87 | 0.90 | 0.90 | 0.90 | 0.90 | 0.86 | 0.91 | 0.89 | 0.87 | 0.90 | 0.90 | 0.92 | 0.85 | 0.84 | 0.91 | 0.89 | 0.90 | 0.90 |
|              | 4  | 0.90        | 0.90 | 0.92 | 0.92 | 0.92 | 0.91 | 0.89 | 0.93 | 0.90 | 0.87 | 0.89 | 0.91 | 0.94 | 0.88 | 0.85 | 0.89 | 0.91 | 0.92 | 0.91 |
|              | 5  | 0.90        | 0.87 | 0.91 | 0.90 | 0.88 | 0.88 | 0.89 | 0.91 | 0.89 | 0.87 | 0.91 | 0.89 | 0.91 | 0.85 | 0.83 | 0.89 | 0.88 | 0.90 | 0.90 |

Table S8. TM-Scores for human complexes with respect to the XWnt8-mFzd8 CRD complex (PDB 4F0A).

|              |    | <b>hWnt</b> |      |      |      |      |      |      |      |      |      |      |      |      |      |      |      |      |      |      |
|--------------|----|-------------|------|------|------|------|------|------|------|------|------|------|------|------|------|------|------|------|------|------|
|              |    | 1           | 2    | 2b   | 3    | 3a   | 4    | 5a   | 5b   | 6    | 7a   | 7b   | 8a   | 8b   | 9a   | 9b   | 10a  | 10b  | 11   | 16   |
| <b>hFzd</b>  | 1  | 0.91        | 0.92 | 0.93 | 0.92 | 0.92 | 0.91 | 0.89 | 0.89 | 0.90 | 0.90 | 0.93 | 0.95 | 0.95 | 0.89 | 0.87 | 0.92 | 0.92 | 0.92 | 0.91 |
|              | 2  | 0.92        | 0.92 | 0.93 | 0.92 | 0.92 | 0.91 | 0.90 | 0.89 | 0.91 | 0.90 | 0.91 | 0.96 | 0.95 | 0.89 | 0.88 | 0.93 | 0.91 | 0.92 | 0.91 |
|              | 3  | 0.88        | 0.90 | 0.91 | 0.88 | 0.91 | 0.90 | 0.88 | 0.88 | 0.88 | 0.87 | 0.91 | 0.93 | 0.94 | 0.88 | 0.85 | 0.91 | 0.91 | 0.90 | 0.90 |
|              | 4  | 0.92        | 0.92 | 0.94 | 0.94 | 0.93 | 0.92 | 0.89 | 0.91 | 0.91 | 0.89 | 0.93 | 0.96 | 0.96 | 0.89 | 0.88 | 0.93 | 0.93 | 0.93 | 0.92 |
|              | 5  | 0.92        | 0.92 | 0.93 | 0.93 | 0.93 | 0.92 | 0.90 | 0.90 | 0.91 | 0.91 | 0.91 | 0.96 | 0.96 | 0.90 | 0.88 | 0.93 | 0.93 | 0.90 | 0.89 |
|              | 6  | 0.87        | 0.90 | 0.92 | 0.91 | 0.91 | 0.90 | 0.88 | 0.88 | 0.89 | 0.88 | 0.90 | 0.92 | 0.94 | 0.87 | 0.86 | 0.91 | 0.91 | 0.90 | 0.90 |
|              | 7  | 0.91        | 0.92 | 0.92 | 0.92 | 0.91 | 0.89 | 0.89 | 0.89 | 0.91 | 0.90 | 0.92 | 0.96 | 0.95 | 0.88 | 0.85 | 0.92 | 0.92 | 0.92 | 0.91 |
|              | 8  | 0.91        | 0.93 | 0.94 | 0.93 | 0.93 | 0.92 | 0.91 | 0.90 | 0.91 | 0.91 | 0.93 | 0.95 | 0.95 | 0.90 | 0.88 | 0.94 | 0.94 | 0.94 | 0.92 |
|              | 9  | 0.91        | 0.90 | 0.92 | 0.93 | 0.92 | 0.92 | 0.90 | 0.89 | 0.91 | 0.91 | 0.93 | 0.96 | 0.93 | 0.90 | 0.88 | 0.93 | 0.93 | 0.92 | 0.92 |
|              | 10 | 0.91        | 0.89 | 0.93 | 0.93 | 0.93 | 0.92 | 0.90 | 0.90 | 0.91 | 0.91 | 0.93 | 0.96 | 0.93 | 0.89 | 0.88 | 0.93 | 0.93 | 0.92 | 0.90 |
| <b>hSFRP</b> | 1  | 0.89        | 0.89 | 0.90 | 0.88 | 0.91 | 0.90 | 0.88 | 0.89 | 0.86 | 0.89 | 0.91 | 0.94 | 0.93 | 0.86 | 0.85 | 0.89 | 0.89 | 0.90 | 0.90 |
|              | 2  | 0.91        | 0.89 | 0.92 | 0.92 | 0.92 | 0.90 | 0.87 | 0.89 | 0.87 | 0.88 | 0.92 | 0.95 | 0.93 | 0.89 | 0.85 | 0.89 | 0.93 | 0.88 | 0.90 |
|              | 3  | 0.89        | 0.89 | 0.92 | 0.92 | 0.86 | 0.90 | 0.86 | 0.87 | 0.88 | 0.87 | 0.90 | 0.94 | 0.94 | 0.85 | 0.86 | 0.89 | 0.91 | 0.90 | 0.86 |
|              | 4  | 0.91        | 0.92 | 0.92 | 0.92 | 0.91 | 0.91 | 0.89 | 0.89 | 0.88 | 0.88 | 0.90 | 0.95 | 0.94 | 0.86 | 0.87 | 0.92 | 0.91 | 0.92 | 0.91 |
|              | 5  | 0.89        | 0.88 | 0.91 | 0.89 | 0.88 | 0.91 | 0.87 | 0.88 | 0.89 | 0.89 | 0.91 | 0.94 | 0.91 | 0.85 | 0.85 | 0.88 | 0.88 | 0.88 | 0.87 |

Table S9. C $\alpha$  RMSDs for mouse complexes with respect to the XWnt8-mFzd8 CRD complex (PDB 4F0A).

|              | mWnt |      |      |      |      |      |      |      |      |      |      |      |      |      |      |      |      |      |      |      |
|--------------|------|------|------|------|------|------|------|------|------|------|------|------|------|------|------|------|------|------|------|------|
|              | 1    | 2    | 2b   | 3    | 3a   | 4    | 5    | 5b   | 6    | 7a   | 7b   | 8a   | 8b   | 9a   | 9b   | 10a  | 10b  | 11   | 16   |      |
| <b>mFzd</b>  | 1    | 1.61 | 1.48 | 1.29 | 1.29 | 1.30 | 1.34 | 1.27 | 1.43 | 1.69 | 1.55 | 1.31 | 1.03 | 1.16 | 1.75 | 1.54 | 1.36 | 1.44 | 1.42 | 1.55 |
|              | 2    | 1.49 | 1.52 | 1.32 | 1.34 | 1.37 | 1.22 | 1.26 | 1.46 | 1.62 | 1.58 | 1.37 | 1.27 | 1.17 | 1.77 | 1.53 | 1.45 | 1.31 | 1.31 | 1.58 |
|              | 3    | 1.89 | 1.51 | 1.26 | 1.37 | 1.26 | 1.33 | 1.44 | 1.37 | 1.67 | 1.56 | 1.26 | 1.27 | 1.12 | 1.66 | 1.47 | 1.43 | 1.38 | 1.45 | 1.60 |
|              | 4    | 1.54 | 1.48 | 1.28 | 1.28 | 1.18 | 1.34 | 1.19 | 1.26 | 1.63 | 1.42 | 1.27 | 0.98 | 1.02 | 1.61 | 1.38 | 1.40 | 1.17 | 1.24 | 1.39 |
|              | 5    | 1.58 | 1.42 | 1.13 | 1.19 | 1.21 | 1.24 | 1.20 | 1.28 | 1.58 | 1.49 | 1.23 | 1.04 | 0.98 | 1.58 | 1.45 | 1.25 | 1.32 | 1.25 | 1.43 |
|              | 6    | 1.69 | 1.44 | 1.23 | 1.29 | 1.31 | 1.30 | 1.35 | 1.33 | 1.73 | 1.54 | 1.36 | 1.13 | 1.05 | 1.82 | 1.58 | 1.37 | 1.38 | 1.39 | 1.41 |
|              | 7    | 1.63 | 1.44 | 1.36 | 1.22 | 1.24 | 1.44 | 1.42 | 1.34 | 1.65 | 1.59 | 1.39 | 1.13 | 1.05 | 2.08 | 1.53 | 1.39 | 1.41 | 1.28 | 1.51 |
|              | 8    | 1.54 | 1.33 | 1.14 | 1.11 | 1.20 | 1.24 | 1.14 | 1.33 | 1.54 | 1.49 | 1.21 | 1.06 | 0.99 | 1.30 | 1.47 | 1.23 | 1.29 | 1.22 | 1.42 |
|              | 9    | 1.60 | 1.45 | 1.20 | 1.20 | 1.11 | 1.34 | 1.25 | 1.36 | 1.62 | 1.53 | 1.27 | 1.09 | 1.07 | 1.56 | 1.50 | 1.32 | 1.37 | 1.38 | 1.48 |
|              | 10   | 1.50 | 1.39 | 1.22 | 1.22 | 1.23 | 1.35 | 1.19 | 1.32 | 1.61 | 1.53 | 1.23 | 1.06 | 1.10 | 1.67 | 1.46 | 1.34 | 1.38 | 1.34 | 1.41 |
| <b>mSFRP</b> | 1    | 1.69 | 1.59 | 1.49 | 1.48 | 1.41 | 1.53 | 1.36 | 1.56 | 1.65 | 1.80 | 1.52 | 1.25 | 1.25 | 1.77 | 1.56 | 1.46 | 1.47 | 1.52 | 1.67 |
|              | 2    | 1.62 | 1.39 | 1.20 | 1.23 | 1.19 | 1.31 | 1.33 | 1.48 | 1.78 | 1.60 | 1.44 | 0.85 | 1.09 | 1.70 | 1.44 | 1.35 | 1.22 | 1.25 | 1.51 |
|              | 3    | 1.52 | 1.25 | 1.13 | 1.58 | 1.19 | 1.19 | 1.04 | 1.43 | 1.70 | 1.36 | 1.63 | 1.03 | 1.04 | 1.82 | 1.47 | 1.35 | 1.34 | 1.24 | 1.37 |
|              | 4    | 1.75 | 1.45 | 1.34 | 1.29 | 1.38 | 1.48 | 1.25 | 1.30 | 1.65 | 1.52 | 1.30 | 1.03 | 1.07 | 1.49 | 1.47 | 1.47 | 1.40 | 1.21 | 1.51 |
|              | 5    | 1.58 | 1.61 | 1.34 | 1.82 | 1.33 | 1.33 | 1.59 | 1.48 | 1.63 | 1.70 | 1.36 | 1.09 | 1.26 | 1.77 | 1.70 | 1.48 | 1.42 | 1.37 | 1.54 |

Table S10. C $\alpha$  RMSDs for human complexes with respect to the XWnt8-mFzd8 CRD complex (PDB 4F0A).

|              | hWnt |      |      |      |      |      |      |      |      |      |      |      |      |      |      |      |      |      |      |      |
|--------------|------|------|------|------|------|------|------|------|------|------|------|------|------|------|------|------|------|------|------|------|
|              | 1    | 2    | 2b   | 3    | 3a   | 4    | 5a   | 5b   | 6    | 7a   | 7b   | 8a   | 8b   | 9a   | 9b   | 10a  | 10b  | 11   | 16   |      |
| <b>hFzd</b>  | 1    | 1.62 | 1.39 | 1.30 | 1.27 | 1.38 | 1.38 | 1.27 | 1.54 | 1.64 | 1.55 | 1.31 | 1.13 | 1.13 | 1.66 | 1.52 | 1.38 | 1.37 | 1.42 | 1.52 |
|              | 2    | 1.52 | 1.49 | 1.37 | 1.32 | 1.25 | 1.38 | 1.26 | 1.57 | 1.56 | 1.58 | 1.45 | 0.99 | 1.16 | 1.74 | 1.58 | 1.25 | 1.40 | 1.39 | 1.54 |
|              | 3    | 2.05 | 1.36 | 1.25 | 1.20 | 1.30 | 1.26 | 1.44 | 1.63 | 1.81 | 1.56 | 1.30 | 1.24 | 1.03 | 1.56 | 1.70 | 1.36 | 1.32 | 1.41 | 1.54 |
|              | 4    | 1.35 | 1.41 | 1.12 | 1.13 | 1.24 | 1.28 | 1.05 | 1.43 | 1.72 | 1.50 | 1.22 | 0.62 | 0.93 | 1.61 | 1.54 | 1.37 | 1.38 | 1.24 | 1.44 |
|              | 5    | 1.53 | 1.36 | 1.17 | 1.18 | 1.18 | 1.21 | 1.18 | 1.46 | 1.66 | 1.47 | 1.21 | 0.98 | 1.03 | 1.55 | 1.47 | 1.29 | 1.28 | 1.29 | 1.53 |
|              | 6    | 1.74 | 1.45 | 1.21 | 1.21 | 1.16 | 1.37 | 1.23 | 1.59 | 1.74 | 1.49 | 1.37 | 1.70 | 1.08 | 1.70 | 1.50 | 1.37 | 1.31 | 1.43 | 1.40 |
|              | 7    | 1.64 | 1.46 | 1.36 | 1.23 | 1.74 | 1.33 | 1.42 | 1.56 | 1.68 | 1.59 | 1.42 | 1.00 | 1.25 | 1.63 | 1.58 | 1.37 | 1.41 | 1.38 | 1.60 |
|              | 8    | 1.58 | 1.32 | 1.15 | 1.17 | 1.15 | 1.21 | 1.14 | 1.41 | 1.54 | 1.49 | 1.17 | 1.02 | 0.92 | 1.46 | 1.46 | 1.15 | 1.16 | 1.13 | 1.43 |
|              | 9    | 1.61 | 1.41 | 1.32 | 1.23 | 1.35 | 1.27 | 1.26 | 1.53 | 1.73 | 1.55 | 1.22 | 1.02 | 1.11 | 1.55 | 1.51 | 1.30 | 1.30 | 1.37 | 1.51 |
|              | 10   | 1.51 | 1.48 | 1.23 | 1.20 | 1.21 | 1.27 | 1.29 | 1.46 | 1.65 | 1.52 | 1.23 | 1.00 | 1.08 | 1.60 | 1.52 | 1.29 | 1.38 | 1.31 | 1.44 |
| <b>hSFRP</b> | 1    | 1.67 | 1.95 | 1.90 | 1.38 | 1.32 | 1.40 | 1.35 | 1.50 | 1.75 | 1.62 | 1.43 | 1.01 | 1.23 | 1.70 | 2.15 | 1.46 | 1.45 | 1.34 | 1.51 |
|              | 2    | 1.52 | 1.52 | 1.25 | 1.24 | 1.26 | 1.34 | 1.33 | 1.59 | 1.80 | 1.60 | 1.37 | 0.84 | 1.09 | 1.51 | 1.52 | 1.46 | 1.20 | 1.54 | 1.88 |
|              | 3    | 1.33 | 1.40 | 1.02 | 1.23 | 1.24 | 1.37 | 1.10 | 1.32 | 1.61 | 1.44 | 1.11 | 0.81 | 0.85 | 1.34 | 1.36 | 1.20 | 1.18 | 1.07 | 1.36 |
|              | 4    | 1.54 | 1.37 | 1.26 | 1.27 | 1.39 | 1.29 | 1.21 | 1.50 | 1.73 | 1.49 | 1.24 | 0.90 | 1.10 | 1.49 | 1.52 | 1.37 | 1.34 | 1.21 | 1.51 |
|              | 5    | 1.70 | 2.25 | 1.38 | 2.09 | 1.31 | 1.27 | 1.32 | 1.56 | 1.70 | 1.66 | 1.40 | 1.09 | 1.26 | 1.64 | 1.64 | 1.42 | 1.39 | 1.51 | 1.57 |

Table S11. Descriptors considered during model building.

| <b>Name</b>             | <b>Source</b>  |
|-------------------------|----------------|
| MMGBSA dG Bind          | Prime MM-GB/SA |
| MMGBSA dG Bind Coulomb  | Prime MM-GB/SA |
| MMGBSA dG Bind Covalent | Prime MM-GB/SA |
| MMGBSA dG Bind Lipo     | Prime MM-GB/SA |
| MMGBSA dG Bind Solv GB  | Prime MM-GB/SA |
| MMGBSA dG Bind Solv SA  | Prime MM-GB/SA |
| MMGBSA dG Bind vdW      | Prime MM-GB/SA |
| CP_BFKV                 | CCharPPI       |
| CP_BL                   | CCharPPI       |
| CP_BT                   | CCharPPI       |
| CP_HLPL                 | CCharPPI       |
| CP_MJPL                 | CCharPPI       |
| CP_MJ3h                 | CCharPPI       |
| CP_MJ2h                 | CCharPPI       |
| CP_MJ1                  | CCharPPI       |
| CP_Qa                   | CCharPPI       |
| CP_Qm                   | CCharPPI       |
| CP_Qp                   | CCharPPI       |
| CP_RO                   | CCharPPI       |
| CP_SKOb                 | CCharPPI       |
| CP_TD                   | CCharPPI       |
| CP_TEI                  | CCharPPI       |
| CP_TEs                  | CCharPPI       |
| CP_TS                   | CCharPPI       |
| CP_SKOIP                | CCharPPI       |
| AP_DCOMPLEX             | CCharPPI       |
| AP_dDFIRE               | CCharPPI       |
| AP_DFIRE2               | CCharPPI       |
| CP_RMFCEN1              | CCharPPI       |
| CP_RMFCEN2              | CCharPPI       |
| CP_RMFCA                | CCharPPI       |
| CP_TB                   | CCharPPI       |
| CP_TSC                  | CCharPPI       |
| AP_T1                   | CCharPPI       |
| AP_DOPE                 | CCharPPI       |
| AP_DOPE_HR              | CCharPPI       |
| AP_ACE                  | CCharPPI       |
| INSIDE                  | CCharPPI       |
| HBOND                   | CCharPPI       |
| ALIPH                   | CCharPPI       |
| FA_ATR                  | CCharPPI       |
| FA_REP                  | CCharPPI       |
| LK_SOLV                 | CCharPPI       |
| FA_PP                   | CCharPPI       |
| CG_ENV                  | CCharPPI       |
| CG_BETA                 | CCharPPI       |
| HBOND2                  | CCharPPI       |
| ROSETTA                 | CCharPPI       |
| ROSETTADOCK             | CCharPPI       |

|               |          |
|---------------|----------|
| NHB           | CCharPPI |
| ELE           | CCharPPI |
| DESOLV        | CCharPPI |
| VDW           | CCharPPI |
| PYDOCK_TOT    | CCharPPI |
| ODA           | CCharPPI |
| SIPPER        | CCharPPI |
| AP_OPUS_PSP   | CCharPPI |
| AP_GEOMETRIC  | CCharPPI |
| AP_DARS       | CCharPPI |
| AP_URS        | CCharPPI |
| AP_WENG       | CCharPPI |
| CP_DECK       | CCharPPI |
| CP_ZPAIR_CB   | CCharPPI |
| CP_ZLOCAL_CB  | CCharPPI |
| CP_ELOCAL_CB  | CCharPPI |
| CP_E3DC_CB    | CCharPPI |
| CP_E3D_CB     | CCharPPI |
| CP_ZPAIR_MIN  | CCharPPI |
| CP_ZLOCAL_MIN | CCharPPI |
| CP_ZS3DC_MIN  | CCharPPI |
| CP_Z3DC_MIN   | CCharPPI |
| CP_ELOCAL_MIN | CCharPPI |
| CP_E3D_MIN    | CCharPPI |
| AP_calRW      | CCharPPI |
| AP_calRWp     | CCharPPI |
| AP_GOAP_DF    | CCharPPI |
| AP_GOAP_G     | CCharPPI |
| AP_PISA       | CCharPPI |
| FIREDOCK      | CCharPPI |
| FIREDOCK_AB   | CCharPPI |
| FIREDOCK_EI   | CCharPPI |

---



Table S12. Best performing three-descriptor models (RMSE<sub>train</sub>, RMSE<sub>test</sub> < 0.40 kcal/mol).

| Model ( $\Delta G$ (kcal/mol) = ...)                                                                      | RMSE <sub>train</sub> | RMSE <sub>test</sub> | InExp <sub>train</sub> | InExp <sub>test</sub> |
|-----------------------------------------------------------------------------------------------------------|-----------------------|----------------------|------------------------|-----------------------|
| $0.21816 \times AP\_dDFIRE - 0.18648 \times MMGBSA\ dG\ Bind - 0.00055766 \times CP\_RMFCA - 17.716$      | 0.39                  | 0.33                 | 60%                    | 50%                   |
| $0.18371 \times AP\_DFIRE2 - 0.15660 \times MMGBSA\ dG\ Bind - 0.00055871 \times CP\_RMFCA - 16.395$      | 0.34                  | 0.33                 | 60%                    | 50%                   |
| $0.15502 \times AP\_DFIRE2 - 0.14163 \times MMGBSA\ dG\ Bind - 0.24627 \times HBOND2 - 13.557$            | 0.34                  | 0.38                 | 53%                    | 75%                   |
| $0.0028131 \times AP\_GOAP\_DF - 0.15928 \times MMGBSA\ dG\ Bind - 0.00052876 \times CP\_RMFCA - 17.520$  | 0.36                  | 0.35                 | 60%                    | 50%                   |
| $0.0016543 \times AP\_calRW - 0.15889 \times MMGBSA\ dG\ Bind - 0.00059240 \times CP\_RMFCA - 14.146$     | 0.34                  | 0.32                 | 60%                    | 50%                   |
| $0.0016602 \times AP\_calRWp - 0.15897 \times MMGBSA\ dG\ Bind - 0.00058860 \times CP\_RMFCA - 13.968$    | 0.34                  | 0.32                 | 60%                    | 50%                   |
| $0.0031082 \times AP\_GOAP\_DF - 0.23987 \times MMGBSA\ dG\ Bind\ vdW - 0.18455 \times HBOND2 - 13.711$   | 0.32                  | 0.28                 | 53%                    | 63%                   |
| $0.0015763 \times CP\_E3D\_CB - 0.24556 \times MMGBSA\ dG\ Bind\ vdW - 0.22431 \times HBOND2 - 15.176$    | 0.36                  | 0.36                 | 53%                    | 50%                   |
| $0.0017757 \times AP\_calRWp - 0.24096 \times MMGBSA\ dG\ Bind\ vdW - 0.20469 \times HBOND2 - 9.7535$     | 0.30                  | 0.30                 | 67%                    | 75%                   |
| $0.065874 \times NHB + 0.0034340 \times AP\_GOAP\_DF - 0.24326 \times MMGBSA\ dG\ Bind\ vdW - 12.833$     | 0.36                  | 0.38                 | 53%                    | 50%                   |
| $0.0087303 \times AP\_DARS - 0.29292 \times MMGBSA\ dG\ Bind\ vdW - 0.00026790 \times CP\_RMFCA - 20.681$ | 0.38                  | 0.39                 | 60%                    | 50%                   |
| $0.26323 \times AP\_dDFIRE - 0.29244 \times MMGBSA\ dG\ Bind\ vdW - 0.00042005 \times CP\_RMFCA - 15.570$ | 0.39                  | 0.38                 | 60%                    | 63%                   |
| $0.23059 \times AP\_DFIRE2 - 0.25405 \times MMGBSA\ dG\ Bind\ vdW - 0.00044639 \times CP\_RMFCA - 14.388$ | 0.30                  | 0.35                 | 60%                    | 50%                   |
| $0.17165 \times AP\_DFIRE2 + 0.023350 \times CP\_TEI - 0.30444 \times MMGBSA\ dG\ Bind\ vdW - 14.211$     | 0.36                  | 0.38                 | 53%                    | 63%                   |
| $0.20365 \times AP\_DFIRE2 - 0.23701 \times MMGBSA\ dG\ Bind\ vdW - 0.20039 \times HBOND2 - 12.319$       | 0.30                  | 0.30                 | 67%                    | 50%                   |
| $0.0017891 \times AP\_calRW - 0.23994 \times MMGBSA\ dG\ Bind\ vdW - 0.21047 \times HBOND2 - 9.8024$      | 0.31                  | 0.29                 | 67%                    | 75%                   |

Table S13. Descriptor values, predicted binding energy and predicted dissociation constants for all mouse Wnt-Fzd CRD interactions using Model 1.

| PROTEINS |         | DESCRIPTORS |                    |        |             | BINDING AFFINITY <sup>a</sup> |                |                      |
|----------|---------|-------------|--------------------|--------|-------------|-------------------------------|----------------|----------------------|
| Wnt      | Fzd CRD | AP_calRW    | MMGBSA dG Bind vdW | HBOND2 | FIREDOCK_AB | ΔG                            | K <sub>d</sub> | Approximate strength |
| mWnt1    | mFzd1   | -5074.68    | -31.00             | -5.22  | -104.70     | -9.23                         | 169.69         | +                    |
|          | mFzd2   | -5281.12    | -31.22             | -4.30  | -94.61      | -10.70                        | 14.26          | +++                  |
|          | mFzd3   | -5233.08    | -30.34             | -2.57  | -76.70      | -12.03                        | 1.50           | ++++                 |
|          | mFzd4   | -5608.64    | -32.46             | -4.70  | -104.01     | -11.10                        | 7.21           | ++++                 |
|          | mFzd5   | -5858.39    | -34.32             | -5.43  | -115.46     | -10.88                        | 10.40          | +++                  |
|          | mFzd6   | -4890.46    | -34.58             | -3.09  | -96.38      | -8.66                         | 444.20         | -                    |
|          | mFzd7   | -5265.44    | -30.98             | -5.67  | -104.64     | -9.85                         | 59.23          | ++                   |
|          | mFzd8   | -5676.61    | -33.87             | -3.26  | -119.27     | -10.64                        | 15.74          | +++                  |
|          | mFzd9   | -5438.60    | -33.16             | -1.93  | -109.80     | -10.69                        | 14.48          | +++                  |
|          | mFzd10  | -5212.25    | -32.73             | -4.35  | -110.92     | -9.27                         | 158.73         | +                    |
|          | mSFRP1  | -5254.01    | -34.47             | -6.96  | -133.28     | -7.28                         | 4570.72        | -                    |
|          | mSFRP2  | -5013.35    | -34.50             | -3.73  | -99.03      | -8.86                         | 318.46         | +                    |
|          | mSFRP3  | -5440.90    | -29.35             | -2.69  | -109.32     | -11.39                        | 4.41           | ++++                 |
|          | mSFRP4  | -5620.02    | -32.42             | -2.59  | -104.06     | -11.67                        | 2.76           | ++++                 |
|          | mSFRP5  | -5233.30    | -30.05             | -4.91  | -129.43     | -8.89                         | 300.24         | +                    |
| mWnt2    | mFzd1   | -5179.33    | -34.33             | -5.79  | -89.19      | -9.51                         | 105.34         | +                    |
|          | mFzd2   | -5381.39    | -35.32             | -4.78  | -102.77     | -9.64                         | 85.78          | ++                   |
|          | mFzd3   | -5135.41    | -36.13             | -2.50  | -72.28      | -10.60                        | 16.93          | +++                  |
|          | mFzd4   | -5646.48    | -34.38             | -5.61  | -110.43     | -10.27                        | 29.34          | +++                  |
|          | mFzd5   | -5540.93    | -33.55             | -5.70  | -104.57     | -10.33                        | 26.75          | +++                  |
|          | mFzd6   | -4784.78    | -33.62             | -3.19  | -75.79      | -9.48                         | 112.19         | +                    |
|          | mFzd7   | -5282.69    | -35.07             | -5.76  | -89.54      | -9.73                         | 72.86          | ++                   |
|          | mFzd8   | -5351.56    | -31.42             | -3.84  | -100.10     | -10.76                        | 12.78          | +++                  |
|          | mFzd9   | -5323.28    | -31.93             | -3.83  | -105.81     | -10.26                        | 30.04          | +++                  |
|          | mFzd10  | -5364.06    | -34.59             | -7.35  | -122.88     | -8.10                         | 1154.35        | -                    |
|          | mSFRP1  | -5059.93    | -34.72             | -4.06  | -98.85      | -8.91                         | 290.14         | +                    |
|          | mSFRP2  | -5058.23    | -37.11             | -3.20  | -92.88      | -8.88                         | 306.99         | +                    |
|          | mSFRP3  | -5312.23    | -30.54             | -5.39  | -107.72     | -10.05                        | 42.65          | ++                   |
|          | mSFRP4  | -5472.46    | -35.46             | -4.07  | -109.04     | -9.81                         | 63.64          | ++                   |

|        |          |          |        |         |         |        |        |      |
|--------|----------|----------|--------|---------|---------|--------|--------|------|
| mWnt2b | mSFRP5   | -5314.40 | -32.81 | -5.87   | -105.99 | -9.51  | 105.24 | +    |
|        | mFzd1    | -4883.44 | -32.65 | -3.37   | -63.31  | -10.65 | 15.47  | +++  |
|        | mFzd2    | -5172.91 | -33.78 | -5.39   | -85.82  | -9.88  | 56.73  | ++   |
|        | mFzd3    | -4945.07 | -28.33 | -1.81   | -55.87  | -12.61 | 0.56   | ++++ |
|        | mFzd4    | -5563.40 | -35.51 | -4.65   | -103.42 | -10.28 | 28.67  | +++  |
|        | mFzd5    | -5352.37 | -32.59 | -4.25   | -76.07  | -11.60 | 3.11   | ++++ |
|        | mFzd6    | -4933.70 | -34.03 | -4.05   | -95.49  | -8.76  | 376.87 | +    |
|        | mFzd7    | -5274.48 | -34.26 | -6.73   | -91.42  | -9.55  | 98.82  | ++   |
|        | mFzd8    | -5119.72 | -31.98 | -4.41   | -96.86  | -9.77  | 67.91  | ++   |
|        | mFzd9    | -5152.70 | -30.65 | -3.70   | -95.01  | -10.46 | 21.17  | +++  |
| mWnt3  | mFzd10   | -5209.10 | -30.24 | -3.50   | -99.55  | -10.60 | 16.94  | +++  |
|        | mSFRP1   | -5016.89 | -34.63 | -3.77   | -95.97  | -8.99  | 257.15 | +    |
|        | mSFRP2   | -5076.22 | -31.66 | -4.25   | -82.56  | -10.43 | 22.35  | +++  |
|        | mSFRP3   | -5085.88 | -30.84 | -3.83   | -72.18  | -11.27 | 5.39   | ++++ |
|        | mSFRP4   | -5585.45 | -35.65 | -3.33   | -98.64  | -10.90 | 10.12  | +++  |
|        | mSFRP5   | -5141.99 | -32.66 | -2.02   | -93.42  | -10.46 | 21.14  | +++  |
|        | mFzd1    | -5496.48 | -32.80 | -5.30   | -107.45 | -10.28 | 28.91  | +++  |
|        | mFzd2    | -5488.11 | -31.94 | -6.02   | -107.74 | -10.25 | 30.47  | +++  |
|        | mFzd3    | -5353.88 | -36.05 | -2.30   | -82.36  | -10.99 | 8.65   | ++++ |
|        | mFzd4    | -5763.95 | -35.55 | -5.50   | -115.13 | -10.25 | 30.47  | +++  |
|        | mFzd5    | -5995.00 | -28.57 | -4.83   | -127.21 | -12.26 | 1.01   | ++++ |
|        | mFzd6    | -5319.01 | -34.12 | -2.13   | -91.40  | -10.89 | 10.38  | +++  |
|        | mFzd7    | -5539.45 | -33.92 | -6.23   | -103.63 | -10.15 | 35.85  | +++  |
|        | mFzd8    | -5528.45 | -30.52 | -3.55   | -93.42  | -12.04 | 1.47   | ++++ |
|        | mFzd9    | -5432.32 | -30.99 | -4.37   | -105.64 | -10.76 | 12.81  | +++  |
|        | mFzd10   | -5776.75 | -30.45 | -7.02   | -124.77 | -10.59 | 17.13  | +++  |
|        | mSFRP1   | -5378.32 | -36.75 | -5.47   | -111.74 | -8.68  | 428.52 | -    |
|        | mSFRP2   | -5309.58 | -37.69 | -4.58   | -110.58 | -8.49  | 595.96 | -    |
|        | mSFRP3   | -5838.86 | -33.28 | -3.66   | -97.64  | -12.37 | 0.85   | ++++ |
|        | mSFRP4   | -5985.22 | -35.87 | -3.42   | -112.88 | -11.65 | 2.88   | ++++ |
| mSFRP5 | -5624.69 | -31.28   | -5.80  | -129.62 | -9.88   | 56.76  | ++     |      |
| mWnt3a | mFzd1    | -5410.88 | -32.06 | -4.55   | -101.29 | -10.61 | 16.51  | +++  |
|        | mFzd2    | -5524.88 | -29.90 | -5.95   | -101.89 | -11.16 | 6.55   | ++++ |

|        |        |          |        |       |         |        |         |      |
|--------|--------|----------|--------|-------|---------|--------|---------|------|
|        | mFzd3  | -5413.67 | -35.21 | -2.81 | -105.25 | -10.14 | 36.36   | +++  |
|        | mFzd4  | -5836.26 | -34.68 | -3.90 | -113.24 | -11.21 | 6.02    | ++++ |
|        | mFzd5  | -5946.28 | -31.28 | -6.77 | -113.92 | -11.65 | 2.83    | ++++ |
|        | mFzd6  | -5264.13 | -34.71 | -2.81 | -91.98  | -10.35 | 25.78   | +++  |
|        | mFzd7  | -5567.30 | -30.44 | -5.50 | -111.14 | -10.85 | 11.06   | +++  |
|        | mFzd8  | -5554.38 | -30.42 | -2.78 | -103.30 | -11.86 | 1.99    | ++++ |
|        | mFzd9  | -5411.50 | -34.55 | -2.20 | -109.74 | -10.21 | 32.44   | +++  |
|        | mFzd10 | -5625.81 | -32.00 | -4.77 | -119.72 | -10.47 | 20.89   | +++  |
|        | mSFRP1 | -5320.10 | -33.18 | -6.11 | -110.66 | -9.16  | 191.53  | +    |
|        | mSFRP2 | -5251.53 | -31.51 | -3.66 | -103.64 | -10.23 | 31.55   | +++  |
|        | mSFRP3 | -5854.30 | -29.20 | -3.38 | -105.63 | -13.02 | 0.28    | ++++ |
|        | mSFRP4 | -5975.20 | -35.07 | -4.03 | -129.43 | -10.81 | 11.74   | +++  |
|        | mSFRP5 | -5432.51 | -36.93 | -3.65 | -127.18 | -8.53  | 556.23  | -    |
| mWnt4  | mFzd1  | -5356.66 | -34.34 | -6.92 | -98.99  | -9.42  | 122.94  | +    |
|        | mFzd2  | -5450.41 | -35.53 | -7.19 | -97.22  | -9.53  | 101.79  | +    |
|        | mFzd3  | -5360.32 | -35.69 | -3.98 | -95.00  | -10.05 | 42.26   | ++   |
|        | mFzd4  | -5547.18 | -34.96 | -5.38 | -112.40 | -9.72  | 74.24   | ++   |
|        | mFzd5  | -5852.27 | -32.63 | -6.78 | -108.69 | -11.25 | 5.62    | ++++ |
|        | mFzd6  | -5271.93 | -36.79 | -2.40 | -82.27  | -10.49 | 20.08   | +++  |
|        | mFzd7  | -5515.36 | -33.84 | -8.67 | -96.66  | -9.83  | 62.25   | ++   |
|        | mFzd8  | -5354.13 | -32.46 | -3.73 | -97.34  | -10.70 | 14.11   | +++  |
|        | mFzd9  | -5318.58 | -33.24 | -3.34 | -98.09  | -10.45 | 21.64   | +++  |
|        | mFzd10 | -5421.85 | -35.48 | -4.96 | -116.03 | -9.05  | 231.84  | +    |
|        | mSFRP1 | -5180.93 | -35.13 | -4.25 | -103.37 | -9.01  | 244.91  | +    |
|        | mSFRP2 | -5272.26 | -37.52 | -4.85 | -115.48 | -8.07  | 1203.08 | -    |
|        | mSFRP3 | -5667.58 | -32.58 | -3.21 | -108.23 | -11.46 | 3.96    | ++++ |
|        | mSFRP4 | -6049.46 | -34.07 | -4.80 | -107.71 | -12.21 | 1.10    | ++++ |
|        | mSFRP5 | -5326.17 | -34.82 | -6.01 | -114.12 | -8.67  | 440.31  | -    |
| mWnt5a | mFzd1  | -5108.67 | -33.73 | -4.41 | -77.28  | -10.31 | 27.26   | +++  |
|        | mFzd2  | -5414.58 | -34.57 | -5.82 | -89.57  | -10.33 | 26.45   | +++  |
|        | mFzd3  | -5423.76 | -33.30 | -4.21 | -95.50  | -10.75 | 13.00   | +++  |
|        | mFzd4  | -5679.15 | -35.51 | -4.85 | -111.87 | -10.26 | 30.05   | +++  |
|        | mFzd5  | -5675.78 | -32.28 | -6.05 | -101.57 | -11.19 | 6.23    | ++++ |

|        |        |          |        |       |         |        |         |      |
|--------|--------|----------|--------|-------|---------|--------|---------|------|
|        | mFzd6  | -4867.59 | -34.94 | -1.40 | -71.62  | -10.14 | 36.38   | +++  |
|        | mFzd7  | -5334.05 | -33.94 | -5.90 | -92.99  | -9.98  | 48.18   | ++   |
|        | mFzd8  | -5472.42 | -31.60 | -4.08 | -93.94  | -11.43 | 4.13    | ++++ |
|        | mFzd9  | -5253.23 | -32.68 | -3.86 | -91.01  | -10.55 | 18.23   | +++  |
|        | mFzd10 | -5338.52 | -33.01 | -3.65 | -103.32 | -10.24 | 30.82   | +++  |
|        | mSFRP1 | -5328.48 | -36.22 | -8.11 | -114.70 | -7.81  | 1859.63 | -    |
|        | mSFRP2 | -5416.60 | -35.15 | -4.90 | -111.49 | -9.34  | 140.71  | +    |
|        | mSFRP3 | -5367.23 | -30.42 | -4.99 | -104.27 | -10.56 | 18.07   | +++  |
|        | mSFRP4 | -5700.57 | -35.02 | -2.46 | -95.79  | -11.84 | 2.07    | ++++ |
|        | mSFRP5 | -5088.20 | -37.00 | -4.66 | -107.10 | -7.95  | 1480.95 | -    |
| mWnt5b | mFzd1  | -5321.63 | -33.87 | -4.96 | -99.43  | -9.85  | 59.19   | ++   |
|        | mFzd2  | -5361.69 | -34.37 | -7.98 | -93.10  | -9.47  | 113.93  | +    |
|        | mFzd3  | -5415.63 | -35.14 | -2.44 | -83.09  | -11.36 | 4.63    | ++++ |
|        | mFzd4  | -5692.32 | -35.41 | -4.85 | -112.63 | -10.29 | 28.35   | +++  |
|        | mFzd5  | -5735.24 | -35.16 | -6.00 | -110.16 | -10.35 | 25.57   | +++  |
|        | mFzd6  | -5049.95 | -36.82 | -4.03 | -77.60  | -9.47  | 113.18  | +    |
|        | mFzd7  | -5505.25 | -34.82 | -5.39 | -106.37 | -9.89  | 55.81   | ++   |
|        | mFzd8  | -5461.02 | -31.83 | -3.67 | -98.85  | -11.19 | 6.17    | ++++ |
|        | mFzd9  | -5408.02 | -33.40 | -3.30 | -105.80 | -10.38 | 24.34   | +++  |
|        | mFzd10 | -5582.17 | -36.07 | -6.01 | -129.16 | -8.61  | 482.31  | -    |
|        | mSFRP1 | -5242.36 | -35.78 | -4.87 | -102.10 | -9.01  | 246.18  | +    |
|        | mSFRP2 | -5381.10 | -34.60 | -4.55 | -121.88 | -8.90  | 297.91  | +    |
|        | mSFRP3 | -5563.89 | -30.88 | -2.86 | -87.59  | -12.56 | 0.61    | ++++ |
|        | mSFRP4 | -5623.82 | -35.16 | -3.55 | -105.65 | -10.75 | 12.98   | +++  |
|        | mSFRP5 | -5693.14 | -30.75 | -6.49 | -126.05 | -10.27 | 29.33   | +++  |
| mWnt6  | mFzd1  | -5335.95 | -31.30 | -4.74 | -90.25  | -11.00 | 8.57    | ++++ |
|        | mFzd2  | -5089.54 | -31.98 | -3.44 | -84.64  | -10.51 | 19.74   | +++  |
|        | mFzd3  | -5307.54 | -34.99 | -2.47 | -80.73  | -11.09 | 7.31    | ++++ |
|        | mFzd4  | -5639.72 | -33.72 | -4.16 | -103.37 | -11.10 | 7.19    | ++++ |
|        | mFzd5  | -5679.96 | -30.45 | -5.26 | -108.52 | -11.46 | 3.90    | ++++ |
|        | mFzd6  | -5097.94 | -33.91 | -4.23 | -91.82  | -9.55  | 98.61   | ++   |
|        | mFzd7  | -5426.29 | -33.78 | -5.52 | -111.49 | -9.53  | 101.78  | +    |
|        | mFzd8  | -5246.91 | -31.62 | -4.44 | -101.93 | -10.08 | 40.53   | ++   |

|        |        |          |        |       |         |        |         |      |
|--------|--------|----------|--------|-------|---------|--------|---------|------|
|        | mFzd9  | -5380.60 | -31.39 | -4.10 | -109.39 | -10.35 | 25.60   | +++  |
|        | mFzd10 | -5494.12 | -32.42 | -5.47 | -109.49 | -10.21 | 32.44   | +++  |
|        | mSFRP1 | -5274.01 | -34.01 | -2.72 | -107.42 | -9.79  | 65.68   | ++   |
|        | mSFRP2 | -5241.87 | -35.52 | -3.59 | -103.76 | -9.30  | 151.35  | +    |
|        | mSFRP3 | -5569.92 | -32.63 | -3.48 | -88.52  | -11.99 | 1.61    | ++++ |
|        | mSFRP4 | -5980.49 | -34.91 | -5.41 | -121.57 | -10.92 | 9.82    | ++++ |
|        | mSFRP5 | -5457.22 | -34.38 | -3.47 | -106.23 | -10.28 | 28.65   | +++  |
| mWnt7a | mFzd1  | -5284.87 | -33.97 | -3.83 | -87.68  | -10.56 | 18.09   | +++  |
|        | mFzd2  | -5413.95 | -37.39 | -4.86 | -94.87  | -9.67  | 81.25   | ++   |
|        | mFzd3  | -5272.43 | -32.75 | -3.45 | -82.99  | -11.11 | 7.11    | ++++ |
|        | mFzd4  | -5704.50 | -35.21 | -5.77 | -116.02 | -9.99  | 47.50   | ++   |
|        | mFzd5  | -5787.96 | -32.50 | -5.35 | -109.20 | -11.36 | 4.66    | ++++ |
|        | mFzd6  | -5095.50 | -39.11 | -3.05 | -103.08 | -8.10  | 1146.21 | -    |
|        | mFzd7  | -5504.88 | -37.30 | -4.54 | -97.80  | -9.96  | 49.16   | ++   |
|        | mFzd8  | -5361.35 | -33.37 | -4.45 | -101.54 | -10.14 | 36.56   | +++  |
|        | mFzd9  | -5378.68 | -32.06 | -2.85 | -100.60 | -10.94 | 9.45    | ++++ |
|        | mFzd10 | -5474.29 | -33.03 | -3.88 | -117.00 | -10.02 | 45.01   | ++   |
|        | mSFRP1 | -5262.63 | -33.80 | -4.02 | -94.22  | -10.14 | 36.88   | +++  |
|        | mSFRP2 | -5180.46 | -37.63 | -2.86 | -97.34  | -9.09  | 214.92  | +    |
|        | mSFRP3 | -5595.52 | -30.68 | -2.22 | -99.88  | -12.27 | 1.00    | ++++ |
|        | mSFRP4 | -5783.44 | -35.32 | -4.11 | -102.90 | -11.33 | 4.94    | ++++ |
|        | mSFRP5 | -5133.57 | -34.78 | -2.78 | -96.47  | -9.62  | 88.54   | ++   |
| mWnt7b | mFzd1  | -5059.18 | -34.31 | -5.34 | -77.28  | -9.77  | 68.89   | ++   |
|        | mFzd2  | -5402.23 | -34.11 | -3.83 | -85.12  | -11.10 | 7.24    | ++++ |
|        | mFzd3  | -5271.19 | -30.78 | -3.13 | -81.61  | -11.70 | 2.64    | ++++ |
|        | mFzd4  | -5717.79 | -38.97 | -4.05 | -101.44 | -10.34 | 25.99   | +++  |
|        | mFzd5  | -5537.05 | -31.68 | -5.39 | -102.32 | -10.92 | 9.79    | ++++ |
|        | mFzd6  | -5032.26 | -33.36 | -2.51 | -74.63  | -10.70 | 14.12   | +++  |
|        | mFzd7  | -5415.75 | -34.46 | -4.75 | -99.86  | -10.11 | 38.43   | +++  |
|        | mFzd8  | -5452.76 | -32.53 | -3.98 | -96.83  | -11.03 | 8.19    | ++++ |
|        | mFzd9  | -5305.49 | -31.83 | -3.68 | -104.19 | -10.33 | 26.61   | +++  |
|        | mFzd10 | -5265.58 | -33.05 | -2.45 | -109.36 | -9.95  | 50.62   | ++   |
|        | mSFRP1 | -5051.85 | -34.48 | -3.88 | -96.69  | -9.09  | 215.35  | +    |

|        |          |          |        |         |         |        |        |      |
|--------|----------|----------|--------|---------|---------|--------|--------|------|
| mWnt8a | mSFRP2   | -5309.31 | -31.28 | -4.76   | -116.09 | -9.61  | 89.44  | ++   |
|        | mSFRP3   | -5547.94 | -32.15 | -2.68   | -99.94  | -11.64 | 2.89   | ++++ |
|        | mSFRP4   | -5757.34 | -34.79 | -4.05   | -92.03  | -11.90 | 1.87   | ++++ |
|        | mSFRP5   | -5181.09 | -36.87 | -3.04   | -94.48  | -9.36  | 136.24 | +    |
|        | mFzd1    | -4966.17 | -33.01 | -3.11   | -75.39  | -10.35 | 25.76  | +++  |
|        | mFzd2    | -5161.48 | -32.09 | -3.08   | -88.61  | -10.65 | 15.53  | +++  |
|        | mFzd3    | -5065.63 | -35.87 | -3.98   | -78.13  | -9.73  | 73.04  | ++   |
|        | mFzd4    | -5450.66 | -34.02 | -4.65   | -102.24 | -10.25 | 30.42  | +++  |
|        | mFzd5    | -5280.15 | -31.41 | -3.63   | -93.71  | -10.86 | 10.79  | +++  |
|        | mFzd6    | -4682.42 | -35.10 | -2.36   | -73.39  | -9.08  | 220.30 | +    |
| mWnt8b | mFzd7    | -5193.03 | -32.31 | -2.76   | -92.02  | -10.63 | 16.11  | +++  |
|        | mFzd8    | -5335.82 | -31.78 | -3.04   | -104.20 | -10.61 | 16.44  | +++  |
|        | mFzd9    | -5105.40 | -33.82 | -2.94   | -95.32  | -9.74  | 71.52  | ++   |
|        | mFzd10   | -5143.39 | -33.31 | -4.77   | -98.23  | -9.41  | 126.02 | +    |
|        | mSFRP1   | -4911.86 | -32.30 | -3.64   | -97.19  | -9.08  | 218.44 | +    |
|        | mSFRP2   | -4810.55 | -33.71 | -2.26   | -79.07  | -9.62  | 87.79  | ++   |
|        | mSFRP3   | -5305.82 | -29.80 | -2.69   | -81.44  | -12.16 | 1.20   | ++++ |
|        | mSFRP4   | -5236.84 | -35.04 | -2.17   | -80.36  | -10.90 | 10.05  | +++  |
|        | mSFRP5   | -4778.75 | -30.99 | -2.41   | -85.18  | -9.77  | 68.24  | ++   |
|        | mFzd1    | -5099.76 | -33.87 | -3.98   | -98.12  | -9.31  | 147.71 | +    |
| mFzd2  | -5179.11 | -34.95   | -4.40  | -87.41  | -9.81   | 64.39  | ++     |      |
| mFzd3  | -4985.54 | -31.33   | -1.55  | -74.57  | -11.22  | 5.86   | ++++   |      |
| mFzd4  | -5378.44 | -34.98   | -4.10  | -104.00 | -9.81   | 64.26  | ++     |      |
| mFzd5  | -5389.40 | -33.40   | -5.92  | -94.32  | -10.24  | 31.04  | +++    |      |
| mFzd6  | -4902.07 | -34.66   | -2.25  | -94.06  | -9.01   | 246.38 | +      |      |
| mFzd7  | -5194.16 | -34.36   | -8.27  | -91.74  | -8.83   | 336.83 | +      |      |
| mFzd8  | -5112.71 | -32.41   | -2.85  | -94.85  | -10.13  | 36.93  | +++    |      |
| mFzd9  | -5105.60 | -35.82   | -2.83  | -94.96  | -9.34   | 141.79 | +      |      |
| mFzd10 | -5043.80 | -32.83   | -5.01  | -101.66 | -8.90   | 294.41 | +      |      |
| mSFRP1 | -4908.99 | -34.92   | -1.97  | -81.26  | -9.69   | 78.65  | ++     |      |
| mSFRP2 | -4893.00 | -36.29   | -2.80  | -79.23  | -9.21   | 174.58 | +      |      |
| mSFRP3 | -5091.44 | -31.35   | -4.60  | -79.83  | -10.61  | 16.56  | +++    |      |
| mSFRP4 | -5315.15 | -35.22   | -2.25  | -91.70  | -10.58  | 17.49  | +++    |      |

|        |         |          |          |        |         |         |         |       |     |
|--------|---------|----------|----------|--------|---------|---------|---------|-------|-----|
| mWnt9a | mSFRP5  | -4950.91 | -36.93   | -4.13  | -89.44  | -8.45   | 630.95  | -     |     |
|        | mFzd1   | -5134.93 | -31.66   | -4.01  | -109.42 | -9.37   | 133.34  | +     |     |
|        | mFzd2   | -5315.47 | -34.29   | -5.53  | -113.94 | -8.87   | 310.93  | +     |     |
|        | mFzd3   | -5386.30 | -37.30   | -6.15  | -105.91 | -8.71   | 406.85  | -     |     |
|        | mFzd4   | -5512.33 | -34.97   | -5.91  | -112.81 | -9.43   | 120.70  | +     |     |
|        | mFzd5   | -5429.76 | -31.97   | -6.40  | -119.88 | -9.32   | 146.44  | +     |     |
|        | mFzd6   | -5109.24 | -34.20   | -2.06  | -82.75  | -10.51  | 19.43   | +++   |     |
|        | mFzd7   | -5312.98 | -34.44   | -5.83  | -116.19 | -8.64   | 459.06  | -     |     |
|        | mFzd8   | -5316.60 | -32.30   | -3.65  | -104.32 | -10.27  | 29.43   | +++   |     |
|        | mFzd9   | -5240.73 | -33.10   | -4.04  | -115.64 | -9.14   | 199.17  | +     |     |
| mWnt9b | mFzd10  | -5204.03 | -35.41   | -5.38  | -104.57 | -8.70   | 417.80  | -     |     |
|        | mSFRP1  | -4988.57 | -34.89   | -4.22  | -105.71 | -8.22   | 932.42  | -     |     |
|        | mSFRP2  | -4783.35 | -35.24   | -5.85  | -92.91  | -7.60   | 2671.56 | -     |     |
|        | mSFRP3  | -5532.61 | -30.56   | -2.57  | -111.41 | -11.40  | 4.39    | ++++  |     |
|        | mSFRP4  | -5407.21 | -35.09   | -4.15  | -95.91  | -10.28  | 28.76   | +++   |     |
|        | mSFRP5  | -4924.67 | -36.22   | -4.09  | -109.97 | -7.50   | 3167.05 | -     |     |
|        | mFzd1   | -4967.83 | -34.21   | -4.62  | -97.22  | -8.62   | 475.61  | -     |     |
|        | mFzd2   | -5148.77 | -34.86   | -3.95  | -105.15 | -8.93   | 280.20  | +     |     |
|        | mFzd3   | -5083.35 | -35.35   | -2.45  | -78.14  | -10.29  | 28.37   | +++   |     |
|        | mFzd4   | -5488.12 | -35.27   | -6.86  | -115.40 | -8.91   | 292.04  | +     |     |
|        | mFzd5   | -5429.80 | -32.38   | -4.98  | -113.76 | -9.88   | 56.36   | ++    |     |
|        | mFzd6   | -5161.81 | -34.41   | -3.78  | -92.79  | -9.75   | 71.26   | ++    |     |
|        | mFzd7   | -5067.43 | -34.40   | -5.13  | -106.64 | -8.36   | 734.45  | -     |     |
|        | mFzd8   | -5403.72 | -31.31   | -4.34  | -110.35 | -10.35  | 25.57   | +++   |     |
|        | mFzd9   | -5204.47 | -34.05   | -4.57  | -103.44 | -9.26   | 161.03  | +     |     |
|        | mFzd10  | -5147.63 | -32.53   | -3.84  | -119.97 | -8.74   | 386.34  | +     |     |
|        | mSFRP1  | -4867.94 | -36.53   | -2.95  | -100.68 | -7.96   | 1460.79 | -     |     |
|        | mSFRP2  | -4954.24 | -37.22   | -4.80  | -91.59  | -8.13   | 1089.96 | -     |     |
|        | mWnt10a | mSFRP3   | -5096.51 | -32.55 | -2.85   | -84.24  | -10.57  | 17.65 | +++ |
|        |         | mSFRP4   | -5589.40 | -34.90 | -3.67   | -111.82 | -10.34  | 25.97 | +++ |
| mSFRP5 |         | -5103.49 | -32.43   | -1.56  | -118.67 | -9.22   | 172.11  | +     |     |
| mFzd1  |         | -5227.43 | -31.87   | -6.07  | -86.06  | -10.34  | 26.24   | +++   |     |
| mFzd2  |         | -5643.63 | -31.40   | -7.10  | -101.95 | -10.99  | 8.75    | ++++  |     |



|         |        |          |        |       |         |        |        |      |
|---------|--------|----------|--------|-------|---------|--------|--------|------|
|         | mFzd3  | -5266.38 | -30.92 | -3.49 | -61.59  | -12.56 | 0.62   | ++++ |
|         | mFzd4  | -5824.01 | -35.75 | -6.45 | -103.65 | -10.77 | 12.57  | +++  |
|         | mFzd5  | -5870.02 | -31.79 | -6.96 | -106.68 | -11.56 | 3.31   | ++++ |
|         | mFzd6  | -5135.94 | -36.28 | -3.29 | -89.36  | -9.52  | 104.93 | +    |
|         | mFzd7  | -5630.07 | -31.76 | -5.66 | -103.88 | -11.11 | 7.07   | ++++ |
|         | mFzd8  | -5561.72 | -32.12 | -3.74 | -95.98  | -11.64 | 2.92   | ++++ |
|         | mFzd9  | -5480.95 | -33.77 | -2.42 | -105.92 | -10.79 | 12.28  | +++  |
|         | mFzd10 | -5606.99 | -35.38 | -4.56 | -114.85 | -9.93  | 51.95  | ++   |
|         | mSFRP1 | -5305.18 | -32.77 | -5.89 | -98.68  | -9.85  | 59.87  | ++   |
|         | mSFRP2 | -5372.57 | -33.13 | -5.13 | -112.03 | -9.55  | 99.66  | ++   |
|         | mSFRP3 | -5961.36 | -34.27 | -6.45 | -111.91 | -11.22 | 5.92   | ++++ |
|         | mSFRP4 | -6238.36 | -35.04 | -4.00 | -129.29 | -11.84 | 2.09   | ++++ |
|         | mSFRP5 | -5298.27 | -32.44 | -5.90 | -104.00 | -9.63  | 87.04  | ++   |
| mWnt10b | mFzd1  | -5199.88 | -31.48 | -6.30 | -86.87  | -10.22 | 31.74  | +++  |
|         | mFzd2  | -5442.90 | -33.78 | -8.00 | -96.67  | -9.73  | 73.48  | ++   |
|         | mFzd3  | -5386.46 | -34.80 | -2.42 | -75.16  | -11.73 | 2.50   | ++++ |
|         | mFzd4  | -5699.57 | -31.03 | -3.85 | -110.62 | -11.65 | 2.85   | ++++ |
|         | mFzd5  | -5734.11 | -31.71 | -6.16 | -118.75 | -10.66 | 15.31  | +++  |
|         | mFzd6  | -5197.61 | -35.29 | -2.81 | -80.92  | -10.51 | 19.48  | +++  |
|         | mFzd7  | -5610.95 | -34.12 | -6.67 | -106.55 | -10.13 | 37.41  | +++  |
|         | mFzd8  | -5613.33 | -32.19 | -6.04 | -104.98 | -10.80 | 11.91  | +++  |
|         | mFzd9  | -5508.10 | -31.92 | -4.55 | -108.14 | -10.67 | 14.87  | +++  |
|         | mFzd10 | -5550.26 | -33.07 | -6.20 | -109.88 | -10.08 | 40.40  | ++   |
|         | mSFRP1 | -5182.66 | -35.84 | -3.66 | -92.88  | -9.53  | 102.89 | +    |
|         | mSFRP2 | -5241.36 | -33.01 | -6.35 | -102.82 | -9.23  | 170.59 | +    |
|         | mSFRP3 | -5764.47 | -30.77 | -4.64 | -99.02  | -12.34 | 0.89   | ++++ |
|         | mSFRP4 | -5807.81 | -35.38 | -4.58 | -104.65 | -11.20 | 6.06   | ++++ |
|         | mSFRP5 | -5383.10 | -36.71 | -5.27 | -117.14 | -8.49  | 592.77 | -    |
| mWnt11  | mFzd1  | -5040.37 | -33.31 | -6.54 | -85.90  | -9.19  | 180.86 | +    |
|         | mFzd2  | -5400.23 | -34.46 | -6.47 | -102.82 | -9.48  | 111.32 | +    |
|         | mFzd3  | -5309.48 | -33.90 | -2.38 | -79.65  | -11.42 | 4.18   | ++++ |
|         | mFzd4  | -5573.00 | -34.75 | -5.79 | -105.92 | -10.09 | 39.97  | +++  |
|         | mFzd5  | -5353.63 | -32.10 | -4.71 | -88.66  | -10.97 | 8.94   | ++++ |

|        |        |          |        |       |         |        |         |      |
|--------|--------|----------|--------|-------|---------|--------|---------|------|
|        | mFzd6  | -5040.50 | -38.87 | -3.68 | -94.82  | -8.20  | 963.89  | -    |
|        | mFzd7  | -5222.60 | -33.65 | -6.39 | -85.21  | -9.88  | 56.33   | ++   |
|        | mFzd8  | -5472.48 | -31.63 | -4.38 | -99.20  | -11.09 | 7.38    | ++++ |
|        | mFzd9  | -5200.17 | -31.63 | -5.61 | -102.47 | -9.58  | 93.46   | ++   |
|        | mFzd10 | -5271.72 | -33.52 | -3.87 | -109.84 | -9.49  | 109.34  | +    |
|        | mSFRP1 | -5200.50 | -35.02 | -5.50 | -102.95 | -8.82  | 337.05  | +    |
|        | mSFRP2 | -5162.47 | -34.88 | -5.15 | -106.54 | -8.62  | 477.87  | -    |
|        | mSFRP3 | -5403.72 | -30.66 | -4.92 | -84.68  | -11.64 | 2.92    | ++++ |
|        | mSFRP4 | -5614.32 | -35.68 | -3.95 | -112.96 | -10.14 | 36.63   | +++  |
|        | mSFRP5 | -5181.64 | -31.09 | -4.02 | -107.26 | -9.79  | 66.41   | ++   |
| mWnt16 | mFzd1  | -5466.87 | -32.37 | -5.85 | -100.56 | -10.47 | 20.90   | +++  |
|        | mFzd2  | -5719.15 | -34.79 | -9.16 | -111.55 | -9.52  | 103.39  | +    |
|        | mFzd3  | -5624.22 | -30.22 | -3.75 | -98.69  | -12.17 | 1.19    | ++++ |
|        | mFzd4  | -5713.11 | -33.92 | -6.05 | -117.83 | -10.15 | 36.03   | +++  |
|        | mFzd5  | -5868.00 | -32.30 | -6.17 | -107.42 | -11.60 | 3.13    | ++++ |
|        | mFzd6  | -4852.22 | -34.87 | -4.29 | -75.18  | -9.21  | 175.18  | +    |
|        | mFzd7  | -5647.84 | -34.39 | -5.34 | -111.35 | -10.29 | 28.17   | +++  |
|        | mFzd8  | -5614.44 | -32.39 | -4.83 | -119.71 | -10.33 | 26.76   | +++  |
|        | mFzd9  | -5528.19 | -31.98 | -2.62 | -101.54 | -11.54 | 3.44    | ++++ |
|        | mFzd10 | -5328.45 | -32.58 | -5.24 | -110.80 | -9.53  | 101.94  | +    |
|        | mSFRP1 | -5262.37 | -38.28 | -7.64 | -103.07 | -7.80  | 1916.49 | -    |
|        | mSFRP2 | -5422.17 | -32.59 | -4.68 | -125.72 | -9.29  | 154.95  | +    |
|        | mSFRP3 | -5710.29 | -30.27 | -5.11 | -115.18 | -11.33 | 4.94    | ++++ |
|        | mSFRP4 | -6140.70 | -35.54 | -4.61 | -118.58 | -11.74 | 2.47    | ++++ |
|        | mSFRP5 | -5307.54 | -31.90 | -5.55 | -107.68 | -9.69  | 78.29   | ++   |

<sup>a</sup>ΔG is in kcal/mol and calculated according to Model 1:  $\Delta G = 0.0038165 \times AP\_calRW - 0.22506 \times MMGBSA\ dG\ Bind\ vdW - 0.24626 \times HBOND2 - 0.049875 \times FIREDOCK\_AB - 3.3475$ .  $K_d$  is in nM and calculated according to the following equation:  $K_d = e^{\frac{\Delta G}{RT}} \times 10^9$ , where ΔG is the binding energy predicted by Model 1, R is the gas constant ( $1.987 \times 10^{-3}$  kcal/(K mol)) and T is standard ambient temperature (298K). Approximate strength based on ranges defined by Dijksterhuis et al. (1): +++++, <10nM; +++, 10-40nM; ++, 40-100nM; +, 100-400nM; -, >400nM.

Table S14. Descriptor values, predicted binding energy and predicted dissociation constants for all human Wnt-Fzd CRD interactions using Model 1.

| PROTEINS |         | DESCRIPTORS |                    |        |             | BINDING AFFINITY <sup>a</sup> |                |                      |
|----------|---------|-------------|--------------------|--------|-------------|-------------------------------|----------------|----------------------|
| Wnt      | Fzd CRD | AP_calRW    | MMGBSA dG Bind vdW | HBOND2 | FIREDOCK_AB | $\Delta G$                    | K <sub>d</sub> | Approximate strength |
| hWnt1    | hFzd1   | -5125.51    | -32.26             | -4.94  | -105.98     | -9.15                         | 196.29         | +                    |
|          | hFzd2   | -5220.44    | -30.91             | -5.34  | -86.54      | -10.68                        | 14.61          | +++                  |
|          | hFzd3   | -5207.67    | -32.02             | -3.82  | -69.88      | -11.59                        | 3.16           | ++++                 |
|          | hFzd4   | -5605.74    | -34.45             | -8.33  | -126.10     | -8.65                         | 453.24         | -                    |
|          | hFzd5   | -5665.03    | -32.21             | -5.95  | -111.05     | -10.72                        | 13.80          | +++                  |
|          | hFzd6   | -4661.20    | -33.24             | -1.60  | -91.60      | -8.69                         | 421.09         | -                    |
|          | hFzd7   | -5419.01    | -30.58             | -6.38  | -111.68     | -10.01                        | 45.87          | ++                   |
|          | hFzd8   | -5498.09    | -32.31             | -4.25  | -114.96     | -10.28                        | 28.91          | +++                  |
|          | hFzd9   | -5473.54    | -32.67             | -3.25  | -113.41     | -10.43                        | 22.44          | +++                  |
|          | hFzd10  | -5287.00    | -32.74             | -4.99  | -110.12     | -9.44                         | 120.10         | +                    |
|          | hSFRP1  | -5116.15    | -35.16             | -3.56  | -96.94      | -9.25                         | 165.10         | +                    |
|          | hSFRP2  | -5046.52    | -34.83             | -4.52  | -95.01      | -8.92                         | 288.74         | +                    |
|          | hSFRP3  | -5314.86    | -29.72             | -3.91  | -85.69      | -11.71                        | 2.60           | ++++                 |
|          | hSFRP4  | -5679.62    | -35.09             | -4.67  | -113.09     | -10.34                        | 26.22          | +++                  |
|          | hSFRP5  | -5308.18    | -34.82             | -6.26  | -126.58     | -7.92                         | 1562.14        | -                    |
| hWnt2    | hFzd1   | -5081.27    | -34.12             | -3.46  | -84.17      | -10.01                        | 45.32          | ++                   |
|          | hFzd2   | -5411.40    | -37.07             | -4.96  | -93.00      | -9.80                         | 65.05          | ++                   |
|          | hFzd3   | -5248.10    | -35.32             | -2.73  | -76.34      | -10.95                        | 9.34           | ++++                 |
|          | hFzd4   | -5429.61    | -34.01             | -3.72  | -104.17     | -10.30                        | 27.74          | +++                  |
|          | hFzd5   | -5714.09    | -30.99             | -6.59  | -117.78     | -10.68                        | 14.62          | +++                  |
|          | hFzd6   | -4620.71    | -33.93             | -1.27  | -67.94      | -9.64                         | 84.44          | ++                   |
|          | hFzd7   | -5308.35    | -35.07             | -5.74  | -97.52      | -9.44                         | 119.59         | +                    |
|          | hFzd8   | -5097.49    | -32.30             | -3.76  | -79.47      | -10.64                        | 15.64          | +++                  |
|          | hFzd9   | -5067.32    | -32.92             | -3.16  | -95.23      | -9.75                         | 70.41          | ++                   |
|          | hFzd10  | -5163.29    | -31.91             | -4.52  | -93.92      | -10.07                        | 40.87          | ++                   |
|          | hSFRP1  | -5031.23    | -35.39             | -4.89  | -102.99     | -8.24                         | 901.29         | -                    |
|          | hSFRP2  | -5080.01    | -33.85             | -4.47  | -98.09      | -9.12                         | 203.37         | +                    |
|          | hSFRP3  | -5208.18    | -30.68             | -2.78  | -81.06      | -11.59                        | 3.15           | ++++                 |
|          | hSFRP4  | -5558.17    | -35.78             | -4.01  | -104.49     | -10.31                        | 27.50          | +++                  |

|        |          |          |          |         |         |        |        |      |
|--------|----------|----------|----------|---------|---------|--------|--------|------|
| hWnt2b | hSFRP5   | -5141.65 | -36.06   | -2.27   | -97.86  | -9.41  | 124.82 | +    |
|        | hFzd1    | -5117.82 | -33.40   | -4.87   | -88.13  | -9.77  | 68.63  | ++   |
|        | hFzd2    | -5183.22 | -34.28   | -4.17   | -87.10  | -10.04 | 43.16  | ++   |
|        | hFzd3    | -5151.61 | -36.42   | -1.99   | -78.64  | -10.40 | 23.61  | +++  |
|        | hFzd4    | -5384.81 | -33.87   | -7.01   | -99.17  | -9.61  | 90.27  | ++   |
|        | hFzd5    | -5388.93 | -31.80   | -5.57   | -103.91 | -10.20 | 32.86  | +++  |
|        | hFzd6    | -4753.32 | -32.99   | -2.56   | -80.33  | -9.43  | 122.15 | +    |
|        | hFzd7    | -5239.07 | -34.63   | -5.52   | -85.67  | -9.92  | 53.44  | ++   |
|        | hFzd8    | -5236.14 | -31.56   | -4.53   | -98.22  | -10.21 | 32.27  | +++  |
|        | hFzd9    | -5276.05 | -31.45   | -4.87   | -102.59 | -10.09 | 39.92  | +++  |
|        | hFzd10   | -5320.50 | -32.22   | -5.42   | -114.86 | -9.34  | 141.76 | +    |
|        | hSFRP1   | -5058.39 | -34.88   | -4.97   | -98.83  | -8.65  | 454.31 | -    |
|        | hSFRP2   | -4888.40 | -32.37   | -3.44   | -86.73  | -9.55  | 99.69  | ++   |
|        | hSFRP3   | -5425.42 | -29.00   | -3.61   | -88.16  | -12.24 | 1.05   | ++++ |
|        | hWnt3    | hSFRP4   | -5787.17 | -33.67  | -3.84   | -99.34 | -11.96 | 1.70 |
| hSFRP5 |          | -5181.91 | -34.95   | -2.75   | -94.91  | -9.85  | 60.01  | ++   |
| hFzd1  |          | -5381.52 | -31.36   | -4.66   | -98.55  | -10.77 | 12.69  | +++  |
| hFzd2  |          | -5490.48 | -31.88   | -8.32   | -102.73 | -9.95  | 50.09  | ++   |
| hFzd3  |          | -5325.29 | -32.29   | -2.39   | -78.51  | -11.90 | 1.87   | ++++ |
| hFzd4  |          | -5779.86 | -34.38   | -8.11   | -110.90 | -10.14 | 36.54  | +++  |
| hFzd5  |          | -6019.14 | -28.42   | -6.14   | -124.95 | -12.18 | 1.17   | ++++ |
| hFzd6  |          | -5166.62 | -35.78   | -2.88   | -92.12  | -9.71  | 75.79  | ++   |
| hFzd7  |          | -5602.13 | -33.92   | -4.08   | -106.64 | -10.77 | 12.60  | +++  |
| hFzd8  |          | -5828.74 | -30.33   | -4.78   | -115.00 | -11.85 | 2.02   | ++++ |
| hFzd9  |          | -5632.10 | -31.00   | -2.79   | -117.73 | -11.31 | 5.10   | ++++ |
| hFzd10 |          | -5640.69 | -34.07   | -4.47   | -115.56 | -10.34 | 25.99  | +++  |
| hSFRP1 |          | -5417.17 | -36.28   | -5.97   | -121.86 | -8.31  | 806.28 | -    |
| hSFRP2 |          | -5329.85 | -35.12   | -3.40   | -108.57 | -9.53  | 102.17 | +    |
| hSFRP3 |          | -5793.83 | -29.12   | -5.37   | -90.65  | -13.06 | 0.26   | ++++ |
| hSFRP4 | -6004.77 | -34.32   | -4.37    | -109.55 | -12.00  | 1.58   | ++++   |      |
| hSFRP5 | -5502.07 | -36.72   | -6.35    | -126.59 | -8.20   | 961.38 | -      |      |
| hWnt3a | hFzd1    | -5316.97 | -31.38   | -3.51   | -100.62 | -10.69 | 14.34  | +++  |
|        | hFzd2    | -5417.95 | -29.94   | -5.66   | -88.41  | -11.48 | 3.78   | ++++ |

|        |        |          |        |       |         |        |        |      |
|--------|--------|----------|--------|-------|---------|--------|--------|------|
|        | hFzd3  | -5319.63 | -32.69 | -3.59 | -76.27  | -11.60 | 3.08   | ++++ |
|        | hFzd4  | -5725.13 | -35.84 | -6.03 | -111.14 | -10.10 | 38.89  | +++  |
|        | hFzd5  | -5608.71 | -30.47 | -6.67 | -95.60  | -11.49 | 3.77   | ++++ |
|        | hFzd6  | -5076.58 | -33.72 | -3.14 | -90.87  | -9.83  | 61.84  | ++   |
|        | hFzd7  | -5721.14 | -30.22 | -6.15 | -122.10 | -10.78 | 12.50  | +++  |
|        | hFzd8  | -5414.12 | -30.54 | -4.69 | -93.80  | -11.30 | 5.13   | ++++ |
|        | hFzd9  | -5374.24 | -31.98 | -1.80 | -103.77 | -11.04 | 7.98   | ++++ |
|        | hFzd10 | -5401.16 | -34.21 | -4.36 | -110.91 | -9.66  | 82.72  | ++   |
|        | hSFRP1 | -5373.17 | -31.75 | -4.01 | -114.16 | -10.03 | 44.28  | ++   |
|        | hSFRP2 | -5337.45 | -34.06 | -1.73 | -96.72  | -10.80 | 11.95  | +++  |
|        | hSFRP3 | -5668.07 | -32.80 | -4.88 | -94.32  | -11.69 | 2.67   | ++++ |
|        | hSFRP4 | -5900.28 | -33.08 | -3.95 | -118.48 | -11.54 | 3.43   | ++++ |
|        | hSFRP5 | -5355.19 | -35.66 | -4.88 | -113.22 | -8.91  | 291.29 | +    |
| hWnt4  | hFzd1  | -5334.08 | -35.25 | -4.77 | -92.86  | -9.96  | 49.21  | ++   |
|        | hFzd2  | -5456.69 | -35.27 | -6.47 | -116.35 | -8.84  | 328.99 | +    |
|        | hFzd3  | -5315.37 | -34.81 | -3.79 | -95.65  | -10.09 | 39.48  | +++  |
|        | hFzd4  | -5374.34 | -34.41 | -3.85 | -108.43 | -9.76  | 69.64  | ++   |
|        | hFzd5  | -5503.62 | -31.15 | -5.30 | -92.36  | -11.43 | 4.14   | ++++ |
|        | hFzd6  | -4958.20 | -33.15 | -2.53 | -97.39  | -9.33  | 143.80 | +    |
|        | hFzd7  | -5391.49 | -34.87 | -5.81 | -93.40  | -9.99  | 47.25  | ++   |
|        | hFzd8  | -5510.28 | -32.83 | -4.16 | -103.75 | -10.79 | 12.19  | +++  |
|        | hFzd9  | -5140.31 | -33.29 | -3.30 | -99.67  | -9.69  | 78.49  | ++   |
|        | hFzd10 | -5334.68 | -31.83 | -4.09 | -106.89 | -10.20 | 32.78  | +++  |
|        | hSFRP1 | -5047.47 | -36.16 | -3.22 | -89.72  | -9.21  | 177.26 | +    |
|        | hSFRP2 | -5268.29 | -31.89 | -5.17 | -99.93  | -10.02 | 44.81  | ++   |
|        | hSFRP3 | -5629.70 | -31.69 | -5.91 | -99.18  | -11.30 | 5.17   | ++++ |
|        | hSFRP4 | -5738.76 | -34.72 | -4.23 | -102.31 | -11.29 | 5.23   | ++++ |
|        | hSFRP5 | -5222.05 | -36.48 | -5.02 | -103.29 | -8.68  | 431.05 | -    |
| hWnt5a | hFzd1  | -5108.67 | -33.73 | -4.41 | -77.28  | -10.31 | 27.26  | +++  |
|        | hFzd2  | -5414.58 | -34.57 | -5.82 | -89.57  | -10.33 | 26.45  | +++  |
|        | hFzd3  | -5423.76 | -33.30 | -4.21 | -95.50  | -10.75 | 13.00  | +++  |
|        | hFzd4  | -5683.63 | -34.26 | -8.89 | -116.45 | -9.33  | 143.63 | +    |
|        | hFzd5  | -5811.29 | -32.06 | -6.48 | -110.18 | -11.22 | 5.89   | ++++ |

|        |        |          |        |       |         |        |        |      |
|--------|--------|----------|--------|-------|---------|--------|--------|------|
|        | hFzd6  | -5306.77 | -36.24 | -3.20 | -106.19 | -9.36  | 136.83 | +    |
|        | hFzd7  | -5334.05 | -33.94 | -5.90 | -92.99  | -9.98  | 48.18  | ++   |
|        | hFzd8  | -5472.42 | -31.60 | -4.08 | -93.94  | -11.43 | 4.13   | ++++ |
|        | hFzd9  | -5283.82 | -31.70 | -3.54 | -96.51  | -10.69 | 14.33  | +++  |
|        | hFzd10 | -5310.19 | -33.08 | -5.91 | -120.99 | -8.68  | 430.12 | -    |
|        | hSFRP1 | -5268.67 | -33.99 | -4.20 | -95.49  | -10.01 | 45.49  | ++   |
|        | hSFRP2 | -5416.60 | -35.15 | -4.90 | -111.49 | -9.34  | 140.71 | +    |
|        | hSFRP3 | -5529.29 | -33.27 | -5.08 | -96.69  | -10.89 | 10.31  | +++  |
|        | hSFRP4 | -5606.86 | -34.85 | -3.89 | -90.82  | -11.41 | 4.25   | ++++ |
|        | hSFRP5 | -5310.86 | -36.03 | -4.44 | -111.26 | -8.87  | 314.74 | +    |
| hWnt5b | hFzd1  | -5168.76 | -33.84 | -5.42 | -86.57  | -9.81  | 64.33  | ++   |
|        | hFzd2  | -5513.26 | -34.49 | -6.00 | -96.14  | -10.35 | 25.50  | +++  |
|        | hFzd3  | -5239.02 | -34.22 | -3.81 | -93.97  | -10.01 | 45.21  | ++   |
|        | hFzd4  | -5833.57 | -35.51 | -7.90 | -115.29 | -9.92  | 52.65  | ++   |
|        | hFzd5  | -5957.00 | -31.77 | -5.48 | -129.73 | -11.11 | 7.08   | ++++ |
|        | hFzd6  | -5227.81 | -37.10 | -3.06 | -107.35 | -8.84  | 328.03 | +    |
|        | hFzd7  | -5500.76 | -35.05 | -4.90 | -109.72 | -9.77  | 67.85  | ++   |
|        | hFzd8  | -5539.38 | -31.33 | -4.44 | -106.51 | -11.03 | 8.10   | ++++ |
|        | hFzd9  | -5414.55 | -35.81 | -3.87 | -114.43 | -9.29  | 152.87 | +    |
|        | hFzd10 | -5380.64 | -34.73 | -3.85 | -120.63 | -9.10  | 210.82 | +    |
|        | hSFRP1 | -5158.20 | -33.88 | -2.54 | -90.13  | -10.29 | 28.52  | +++  |
|        | hSFRP2 | -5168.00 | -35.23 | -2.69 | -117.44 | -8.62  | 474.39 | -    |
|        | hSFRP3 | -5702.86 | -33.06 | -5.48 | -106.57 | -11.01 | 8.47   | ++++ |
|        | hSFRP4 | -5661.96 | -35.06 | -3.07 | -93.76  | -11.63 | 2.94   | ++++ |
|        | hSFRP5 | -5432.88 | -37.16 | -5.24 | -117.59 | -8.56  | 524.50 | -    |
| hWnt6  | hFzd1  | -5232.23 | -31.08 | -4.15 | -78.98  | -11.36 | 4.66   | ++++ |
|        | hFzd2  | -5263.66 | -32.38 | -6.97 | -88.42  | -10.02 | 44.49  | ++   |
|        | hFzd3  | -5290.62 | -35.48 | -2.22 | -75.02  | -11.26 | 5.48   | ++++ |
|        | hFzd4  | -5668.22 | -34.97 | -5.17 | -98.02  | -10.95 | 9.34   | ++++ |
|        | hFzd5  | -5680.62 | -29.47 | -5.04 | -107.47 | -11.80 | 2.23   | ++++ |
|        | hFzd6  | -5021.35 | -32.42 | -2.10 | -95.04  | -9.96  | 49.76  | ++   |
|        | hFzd7  | -5321.62 | -32.53 | -3.89 | -100.01 | -10.39 | 23.91  | +++  |
|        | hFzd8  | -5558.65 | -31.65 | -4.47 | -116.51 | -10.53 | 19.01  | +++  |

|        |        |          |        |       |         |        |        |      |
|--------|--------|----------|--------|-------|---------|--------|--------|------|
|        | hFzd9  | -5504.66 | -30.74 | -4.61 | -108.52 | -10.89 | 10.31  | +++  |
|        | hFzd10 | -5357.12 | -32.21 | -4.41 | -115.12 | -9.72  | 74.85  | ++   |
|        | hSFRP1 | -5230.01 | -34.67 | -4.53 | -110.74 | -8.87  | 314.23 | +    |
|        | hSFRP2 | -5488.81 | -34.64 | -3.25 | -119.13 | -9.76  | 69.74  | ++   |
|        | hSFRP3 | -5674.66 | -30.51 | -6.75 | -86.22  | -12.18 | 1.17   | ++++ |
|        | hSFRP4 | -5853.01 | -34.99 | -3.67 | -102.65 | -11.79 | 2.27   | ++++ |
|        | hSFRP5 | -5444.94 | -30.74 | -3.51 | -112.26 | -10.75 | 13.12  | +++  |
| hWnt7a | hFzd1  | -5284.87 | -33.97 | -3.83 | -87.68  | -10.56 | 18.09  | +++  |
|        | hFzd2  | -5413.95 | -37.39 | -4.86 | -94.87  | -9.67  | 81.25  | ++   |
|        | hFzd3  | -5272.43 | -32.75 | -3.45 | -82.99  | -11.11 | 7.11   | ++++ |
|        | hFzd4  | -5605.57 | -35.20 | -4.64 | -108.28 | -10.28 | 29.10  | +++  |
|        | hFzd5  | -5497.67 | -31.68 | -5.32 | -91.58  | -11.32 | 4.96   | ++++ |
|        | hFzd6  | -4748.48 | -32.77 | -2.12 | -80.55  | -9.56  | 98.20  | ++   |
|        | hFzd7  | -5504.88 | -37.30 | -4.54 | -97.80  | -9.96  | 49.16  | ++   |
|        | hFzd8  | -5361.35 | -33.37 | -4.45 | -101.54 | -10.14 | 36.56  | +++  |
|        | hFzd9  | -5371.27 | -34.79 | -3.74 | -103.69 | -9.92  | 52.63  | ++   |
|        | hFzd10 | -5433.52 | -32.94 | -3.16 | -114.90 | -10.16 | 35.29  | +++  |
|        | hSFRP1 | -5050.47 | -36.10 | -5.38 | -98.32  | -8.27  | 861.04 | -    |
|        | hSFRP2 | -5180.46 | -37.63 | -2.86 | -97.34  | -9.09  | 214.92 | +    |
|        | hSFRP3 | -5604.03 | -31.44 | -4.85 | -87.24  | -12.11 | 1.31   | ++++ |
|        | hSFRP4 | -5456.61 | -35.41 | -3.28 | -97.62  | -10.53 | 19.06  | +++  |
|        | hSFRP5 | -5155.36 | -36.42 | -3.01 | -99.23  | -9.14  | 199.02 | +    |
| hWnt7b | hFzd1  | -5069.82 | -34.66 | -4.43 | -78.89  | -9.87  | 57.62  | ++   |
|        | hFzd2  | -5374.43 | -34.64 | -4.54 | -86.32  | -10.64 | 15.73  | +++  |
|        | hFzd3  | -5172.57 | -30.94 | -2.73 | -72.30  | -11.85 | 2.05   | ++++ |
|        | hFzd4  | -5545.77 | -35.24 | -4.09 | -97.53  | -10.71 | 13.95  | +++  |
|        | hFzd5  | -5683.73 | -31.88 | -5.53 | -101.28 | -11.45 | 4.00   | ++++ |
|        | hFzd6  | -5013.44 | -34.07 | -3.05 | -100.19 | -9.06  | 224.77 | +    |
|        | hFzd7  | -5418.94 | -34.49 | -4.85 | -99.71  | -10.10 | 39.22  | +++  |
|        | hFzd8  | -5431.66 | -32.34 | -3.76 | -95.49  | -11.11 | 7.10   | ++++ |
|        | hFzd9  | -5205.43 | -34.01 | -2.97 | -96.14  | -10.03 | 43.79  | ++   |
|        | hFzd10 | -5369.38 | -34.66 | -2.16 | -108.45 | -10.10 | 39.25  | +++  |
|        | hSFRP1 | -5135.65 | -35.34 | -3.11 | -95.37  | -9.47  | 113.01 | +    |

|        |        |          |        |       |         |        |        |      |
|--------|--------|----------|--------|-------|---------|--------|--------|------|
|        | hSFRP2 | -5188.94 | -33.87 | -2.76 | -83.53  | -10.68 | 14.62  | +++  |
|        | hSFRP3 | -5493.66 | -29.07 | -5.29 | -81.23  | -12.42 | 0.78   | ++++ |
|        | hSFRP4 | -5603.82 | -35.00 | -3.80 | -105.59 | -10.65 | 15.36  | +++  |
|        | hSFRP5 | -5164.84 | -34.00 | -5.18 | -93.43  | -9.47  | 113.01 | +    |
| hWnt8a | hFzd1  | -4995.38 | -31.48 | -3.76 | -83.99  | -10.21 | 32.42  | +++  |
|        | hFzd2  | -5132.74 | -32.56 | -3.80 | -83.43  | -10.51 | 19.49  | +++  |
|        | hFzd3  | -5058.66 | -33.55 | -2.75 | -70.37  | -10.92 | 9.85   | ++++ |
|        | hFzd4  | -5289.35 | -34.52 | -5.28 | -95.99  | -9.68  | 79.86  | ++   |
|        | hFzd5  | -5281.44 | -30.95 | -3.43 | -96.51  | -10.88 | 10.46  | +++  |
|        | hFzd6  | -4673.64 | -32.47 | -2.90 | -78.44  | -9.25  | 163.93 | +    |
|        | hFzd7  | -5112.61 | -32.80 | -4.72 | -91.47  | -9.75  | 70.19  | ++   |
|        | hFzd8  | -5144.71 | -31.59 | -3.18 | -95.06  | -10.35 | 25.78  | +++  |
|        | hFzd9  | -5058.07 | -34.33 | -4.58 | -90.96  | -9.26  | 161.19 | +    |
|        | hFzd10 | -5113.55 | -31.46 | -4.63 | -98.03  | -9.75  | 70.11  | ++   |
|        | hSFRP1 | -4865.37 | -31.93 | -3.79 | -94.16  | -9.10  | 211.68 | +    |
|        | hSFRP2 | -4832.60 | -32.84 | -4.16 | -86.54  | -9.06  | 226.71 | +    |
|        | hSFRP3 | -5275.94 | -29.13 | -3.37 | -82.47  | -11.99 | 1.62   | ++++ |
|        | hSFRP4 | -5269.13 | -34.83 | -2.02 | -88.27  | -10.72 | 13.79  | +++  |
|        | hSFRP5 | -4961.98 | -30.64 | -2.61 | -91.85  | -10.17 | 35.05  | +++  |
| hWnt8b | hFzd1  | -5077.41 | -33.80 | -4.74 | -88.53  | -9.54  | 101.21 | +    |
|        | hFzd2  | -5154.30 | -34.99 | -3.99 | -85.09  | -9.92  | 53.12  | ++   |
|        | hFzd3  | -5021.89 | -35.07 | -2.06 | -74.96  | -10.37 | 24.63  | +++  |
|        | hFzd4  | -5287.95 | -34.02 | -4.68 | -100.90 | -9.69  | 78.54  | ++   |
|        | hFzd5  | -5637.89 | -32.05 | -4.54 | -107.82 | -11.15 | 6.59   | ++++ |
|        | hFzd6  | -4593.74 | -33.19 | -3.10 | -66.61  | -9.32  | 145.18 | +    |
|        | hFzd7  | -5068.34 | -34.29 | -5.35 | -93.93  | -8.97  | 264.18 | +    |
|        | hFzd8  | -5143.70 | -32.40 | -3.71 | -92.70  | -10.15 | 36.04  | +++  |
|        | hFzd9  | -5092.38 | -33.03 | -2.78 | -98.47  | -9.75  | 70.19  | ++   |
|        | hFzd10 | -5146.40 | -33.08 | -3.29 | -101.38 | -9.68  | 79.82  | ++   |
|        | hSFRP1 | -4971.95 | -35.85 | -3.26 | -94.15  | -8.75  | 379.54 | +    |
|        | hSFRP2 | -4821.20 | -33.04 | -3.35 | -90.54  | -8.97  | 262.97 | +    |
|        | hSFRP3 | -5130.11 | -29.64 | -3.52 | -85.93  | -11.10 | 7.18   | ++++ |
|        | hSFRP4 | -5343.75 | -35.44 | -3.34 | -90.16  | -10.45 | 21.77  | +++  |



|         |          |          |        |         |         |         |         |      |
|---------|----------|----------|--------|---------|---------|---------|---------|------|
| hWnt9a  | hSFRP5   | -5079.79 | -32.47 | -2.62   | -100.10 | -9.79   | 66.01   | ++   |
|         | hFzd1    | -5226.24 | -32.08 | -4.96   | -106.87 | -9.52   | 104.12  | +    |
|         | hFzd2    | -5266.17 | -34.35 | -5.21   | -109.00 | -9.00   | 252.49  | +    |
|         | hFzd3    | -5345.14 | -36.33 | -3.53   | -93.20  | -10.05  | 42.26   | ++   |
|         | hFzd4    | -5276.22 | -35.40 | -5.70   | -110.43 | -8.61   | 488.20  | -    |
|         | hFzd5    | -5463.04 | -32.27 | -6.48   | -118.06 | -9.45   | 117.22  | +    |
|         | hFzd6    | -5096.52 | -32.76 | -2.30   | -98.23  | -9.96   | 49.58   | ++   |
|         | hFzd7    | -5207.88 | -34.39 | -6.49   | -114.22 | -8.19   | 989.57  | -    |
|         | hFzd8    | -5403.63 | -32.28 | -4.27   | -109.33 | -10.20  | 32.97   | +++  |
|         | hFzd9    | -5122.08 | -32.37 | -3.91   | -107.44 | -9.29   | 154.18  | +    |
|         | hFzd10   | -5141.55 | -32.76 | -3.44   | -103.09 | -9.61   | 89.81   | ++   |
|         | hSFRP1   | -4940.84 | -35.38 | -2.63   | -99.83  | -8.62   | 479.93  | -    |
|         | hSFRP2   | -4763.78 | -34.83 | -3.46   | -91.33  | -8.28   | 841.16  | -    |
|         | hSFRP3   | -5144.42 | -30.28 | -4.75   | -90.06  | -10.51  | 19.74   | +++  |
|         | hSFRP4   | -5418.18 | -35.43 | -4.76   | -112.75 | -9.26   | 162.56  | +    |
| hWnt9b  | hSFRP5   | -4932.60 | -33.90 | -3.06   | -102.32 | -8.69   | 425.36  | -    |
|         | hFzd1    | -5032.20 | -33.86 | -4.06   | -97.80  | -9.05   | 229.10  | +    |
|         | hFzd2    | -5277.71 | -34.65 | -3.61   | -104.98 | -9.57   | 96.54   | ++   |
|         | hFzd3    | -5089.16 | -34.81 | -0.98   | -76.76  | -10.87  | 10.73   | +++  |
|         | hFzd4    | -5322.72 | -35.25 | -5.15   | -109.91 | -8.98   | 259.62  | +    |
|         | hFzd5    | -5602.89 | -30.54 | -6.14   | -116.11 | -10.55  | 18.20   | +++  |
|         | hFzd6    | -4906.76 | -34.68 | -1.94   | -81.51  | -9.73   | 73.59   | ++   |
|         | hFzd7    | -5075.64 | -34.62 | -5.29   | -102.53 | -8.51   | 575.01  | -    |
|         | hFzd8    | -5389.01 | -31.76 | -3.35   | -101.29 | -10.89  | 10.33   | +++  |
|         | hFzd9    | -5135.63 | -32.52 | -4.51   | -108.10 | -9.13   | 202.19  | +    |
|         | hFzd10   | -5222.85 | -31.85 | -3.32   | -110.58 | -9.78   | 67.09   | ++   |
|         | hSFRP1   | -4822.03 | -35.08 | -4.88   | -103.73 | -7.48   | 3262.66 | -    |
|         | hSFRP2   | -5007.94 | -35.19 | -3.20   | -103.17 | -8.61   | 485.62  | -    |
|         | hSFRP3   | -5360.23 | -32.51 | -3.96   | -90.27  | -11.01  | 8.40    | ++++ |
|         | hSFRP4   | -5462.27 | -33.57 | -2.13   | -108.12 | -10.72  | 13.68   | +++  |
| hSFRP5  | -4981.14 | -36.20   | -4.29  | -116.35 | -7.35   | 4054.56 | -       |      |
| hWnt10a | hFzd1    | -5350.00 | -34.35 | -6.00   | -87.29  | -10.20  | 32.84   | +++  |
|         | hFzd2    | -5488.62 | -32.08 | -10.08  | -98.81  | -9.66   | 81.83   | ++   |

|         |        |          |        |       |         |        |        |      |
|---------|--------|----------|--------|-------|---------|--------|--------|------|
|         | hFzd3  | -5316.43 | -33.24 | -2.58 | -66.77  | -12.19 | 1.14   | ++++ |
|         | hFzd4  | -5751.67 | -34.94 | -4.41 | -107.81 | -10.97 | 8.97   | ++++ |
|         | hFzd5  | -5622.01 | -31.87 | -5.93 | -88.04  | -11.78 | 2.29   | ++++ |
|         | hFzd6  | -4926.90 | -34.03 | -2.92 | -86.76  | -9.45  | 118.23 | +    |
|         | hFzd7  | -5539.19 | -33.57 | -6.44 | -96.58  | -10.53 | 18.96  | +++  |
|         | hFzd8  | -5611.36 | -31.94 | -3.47 | -102.76 | -11.60 | 3.13   | ++++ |
|         | hFzd9  | -5472.15 | -32.84 | -3.32 | -107.26 | -10.67 | 14.86  | +++  |
|         | hFzd10 | -5495.75 | -32.60 | -3.58 | -100.63 | -11.08 | 7.42   | ++++ |
|         | hSFRP1 | -5293.27 | -34.48 | -4.61 | -104.78 | -9.43  | 121.59 | +    |
|         | hSFRP2 | -5280.93 | -35.97 | -4.70 | -102.32 | -9.15  | 196.10 | +    |
|         | hSFRP3 | -5773.46 | -29.84 | -6.06 | -97.39  | -12.32 | 0.93   | ++++ |
|         | hSFRP4 | -5938.36 | -35.00 | -4.35 | -114.18 | -11.37 | 4.59   | ++++ |
|         | hSFRP5 | -5455.90 | -35.24 | -3.64 | -110.71 | -9.82  | 62.86  | ++   |
| hWnt10b | hFzd1  | -5156.09 | -31.78 | -4.18 | -78.20  | -10.94 | 9.42   | ++++ |
|         | hFzd2  | -5432.02 | -33.40 | -6.42 | -93.09  | -10.34 | 26.20  | +++  |
|         | hFzd3  | -5478.15 | -36.71 | -3.04 | -77.63  | -11.37 | 4.57   | ++++ |
|         | hFzd4  | -5917.85 | -34.48 | -5.28 | -120.27 | -10.87 | 10.60  | +++  |
|         | hFzd5  | -5676.75 | -31.71 | -6.09 | -101.07 | -11.33 | 4.87   | ++++ |
|         | hFzd6  | -5232.82 | -32.98 | -2.83 | -95.10  | -10.46 | 21.41  | +++  |
|         | hFzd7  | -5504.24 | -33.04 | -5.32 | -94.52  | -10.89 | 10.25  | +++  |
|         | hFzd8  | -5382.41 | -32.36 | -4.18 | -99.98  | -10.59 | 17.05  | +++  |
|         | hFzd9  | -5456.54 | -32.73 | -3.15 | -101.70 | -10.96 | 9.20   | ++++ |
|         | hFzd10 | -5602.70 | -32.92 | -5.44 | -111.51 | -10.42 | 22.79  | +++  |
|         | hSFRP1 | -5093.64 | -34.76 | -5.55 | -103.33 | -8.44  | 640.96 | -    |
|         | hSFRP2 | -5376.60 | -33.03 | -5.89 | -90.87  | -10.45 | 21.58  | +++  |
|         | hSFRP3 | -5824.58 | -29.93 | -7.19 | -104.13 | -11.88 | 1.95   | ++++ |
|         | hSFRP4 | -5725.59 | -34.69 | -3.76 | -109.81 | -10.99 | 8.71   | ++++ |
|         | hSFRP5 | -5269.80 | -36.90 | -5.43 | -105.92 | -8.53  | 551.06 | -    |
| hWnt11  | hFzd1  | -5038.42 | -33.32 | -6.25 | -86.02  | -9.25  | 164.77 | +    |
|         | hFzd2  | -5277.48 | -34.07 | -6.51 | -96.35  | -9.41  | 124.77 | +    |
|         | hFzd3  | -5199.77 | -34.20 | -2.20 | -70.39  | -11.44 | 4.05   | ++++ |
|         | hFzd4  | -5561.39 | -34.84 | -6.63 | -112.28 | -9.50  | 107.79 | +    |
|         | hFzd5  | -5602.22 | -31.06 | -4.55 | -100.04 | -11.63 | 2.97   | ++++ |

|        |        |          |        |        |         |        |        |      |
|--------|--------|----------|--------|--------|---------|--------|--------|------|
|        | hFzd6  | -4661.44 | -31.53 | -1.28  | -80.21  | -9.72  | 73.79  | ++   |
|        | hFzd7  | -5264.77 | -34.64 | -6.64  | -89.54  | -9.54  | 100.04 | +    |
|        | hFzd8  | -5317.07 | -31.69 | -3.94  | -97.56  | -10.67 | 14.92  | +++  |
|        | hFzd9  | -5182.88 | -32.47 | -4.55  | -93.42  | -10.04 | 43.35  | ++   |
|        | hFzd10 | -5370.64 | -32.92 | -3.78  | -128.57 | -9.09  | 215.09 | +    |
|        | hSFRP1 | -5172.05 | -34.62 | -2.26  | -95.80  | -9.96  | 49.60  | ++   |
|        | hSFRP2 | -5156.51 | -33.11 | -4.60  | -115.43 | -8.68  | 427.70 | -    |
|        | hSFRP3 | -5207.56 | -31.70 | -4.74  | -80.97  | -10.88 | 10.45  | +++  |
|        | hSFRP4 | -5541.09 | -35.35 | -2.66  | -94.03  | -11.19 | 6.17   | ++++ |
|        | hSFRP5 | -5219.82 | -32.66 | -4.74  | -107.78 | -9.38  | 132.46 | +    |
| hWnt16 | hFzd1  | -5722.76 | -34.52 | -7.31  | -110.03 | -10.13 | 37.11  | +++  |
|        | hFzd2  | -5526.44 | -35.27 | -7.60  | -109.87 | -9.15  | 195.05 | +    |
|        | hFzd3  | -5794.42 | -35.88 | -3.62  | -109.89 | -11.01 | 8.35   | ++++ |
|        | hFzd4  | -5600.05 | -35.93 | -5.84  | -112.07 | -9.61  | 90.16  | ++   |
|        | hFzd5  | -5807.22 | -33.05 | -6.82  | -97.45  | -11.53 | 3.48   | ++++ |
|        | hFzd6  | -5163.84 | -35.34 | -2.46  | -97.02  | -9.66  | 82.83  | ++   |
|        | hFzd7  | -5548.70 | -34.91 | -10.33 | -99.55  | -9.16  | 191.75 | +    |
|        | hFzd8  | -5829.12 | -32.14 | -5.01  | -114.55 | -11.41 | 4.25   | ++++ |
|        | hFzd9  | -5459.92 | -31.16 | -4.96  | -110.29 | -10.45 | 21.73  | +++  |
|        | hFzd10 | -5617.41 | -35.51 | -7.48  | -116.93 | -9.12  | 204.64 | +    |
|        | hSFRP1 | -5466.31 | -35.94 | -3.50  | -119.39 | -9.30  | 149.97 | +    |
|        | hSFRP2 | -5604.14 | -33.89 | -3.77  | -122.98 | -10.05 | 42.83  | ++   |
|        | hSFRP3 | -5676.68 | -31.49 | -7.53  | -97.87  | -11.19 | 6.22   | ++++ |
|        | hSFRP4 | -6026.34 | -35.24 | -5.29  | -120.12 | -11.12 | 6.97   | ++++ |
|        | hSFRP5 | -5399.92 | -33.03 | -7.76  | -117.60 | -8.75  | 385.05 | +    |

<sup>a</sup>ΔG is in kcal/mol and calculated according to Model 1:  $\Delta G = 0.0038165 \times AP\_calRW - 0.22506 \times MMGBSA\ dG\ Bind\ vdW - 0.24626 \times HBOND2 - 0.049875 \times FIREDOCK\_AB - 3.3475$ .  $K_d$  is in nM and calculated according to the following equation:  $K_d = e^{\frac{\Delta G}{RT}} \times 10^9$ , where ΔG is the binding energy predicted by Model 1, R is the gas constant ( $1.987 \times 10^{-3}$  kcal/(K mol)) and T is standard ambient temperature (298K). Approximate strength based on ranges defined by Dijksterhuis et al. (1): +++++, <10nM; +++, 10-40nM; ++, 40-100nM; +, 100-400nM; -, >400nM.

Figure S15. Involvement of Wnt residues in recognizing Fzd-type CRDs.<sup>a</sup>

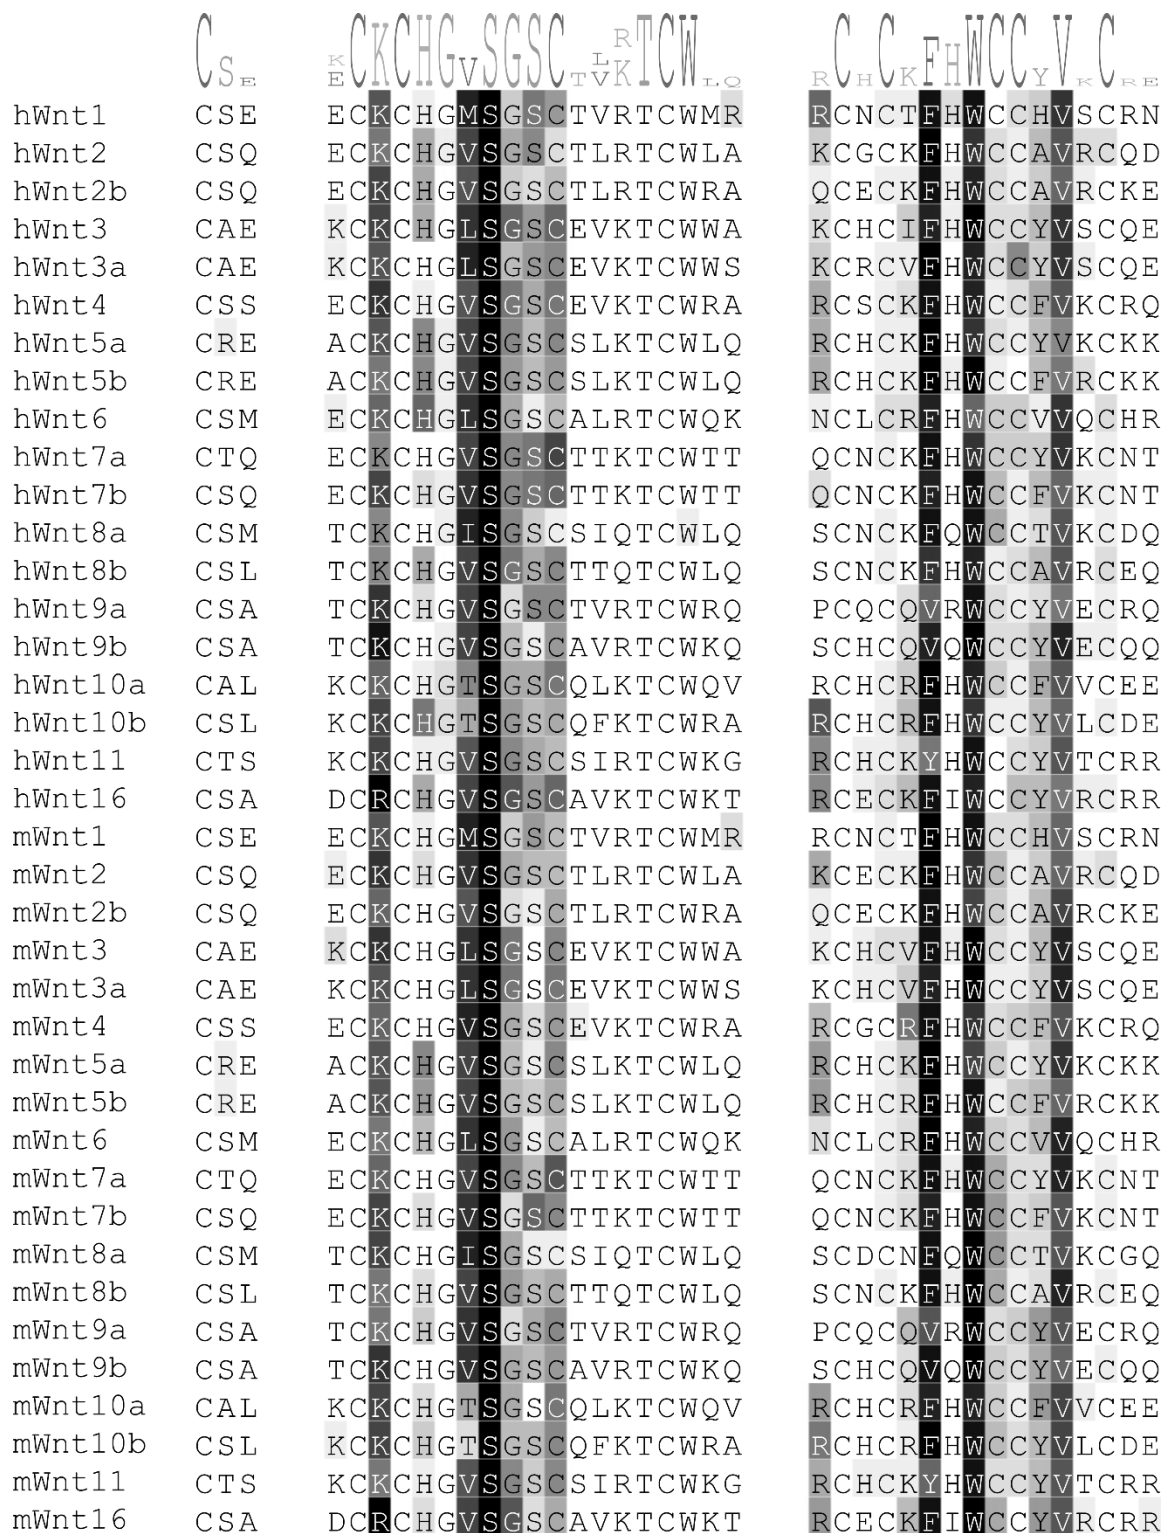

<sup>a</sup>Wnt sequences abridged to the following three locations: cysteine 8 and its two immediately following residues, the Wnt thumb region and the Wnt index finger region. Intensity of shading indicates number of Wnt-Fzd CRD complexes involving the specified Wnt in which that residue is a significant contributor to the binding energy.

Figure S16. Involvement of Fzd-type CRD residues in recognizing Wnts.<sup>a</sup>

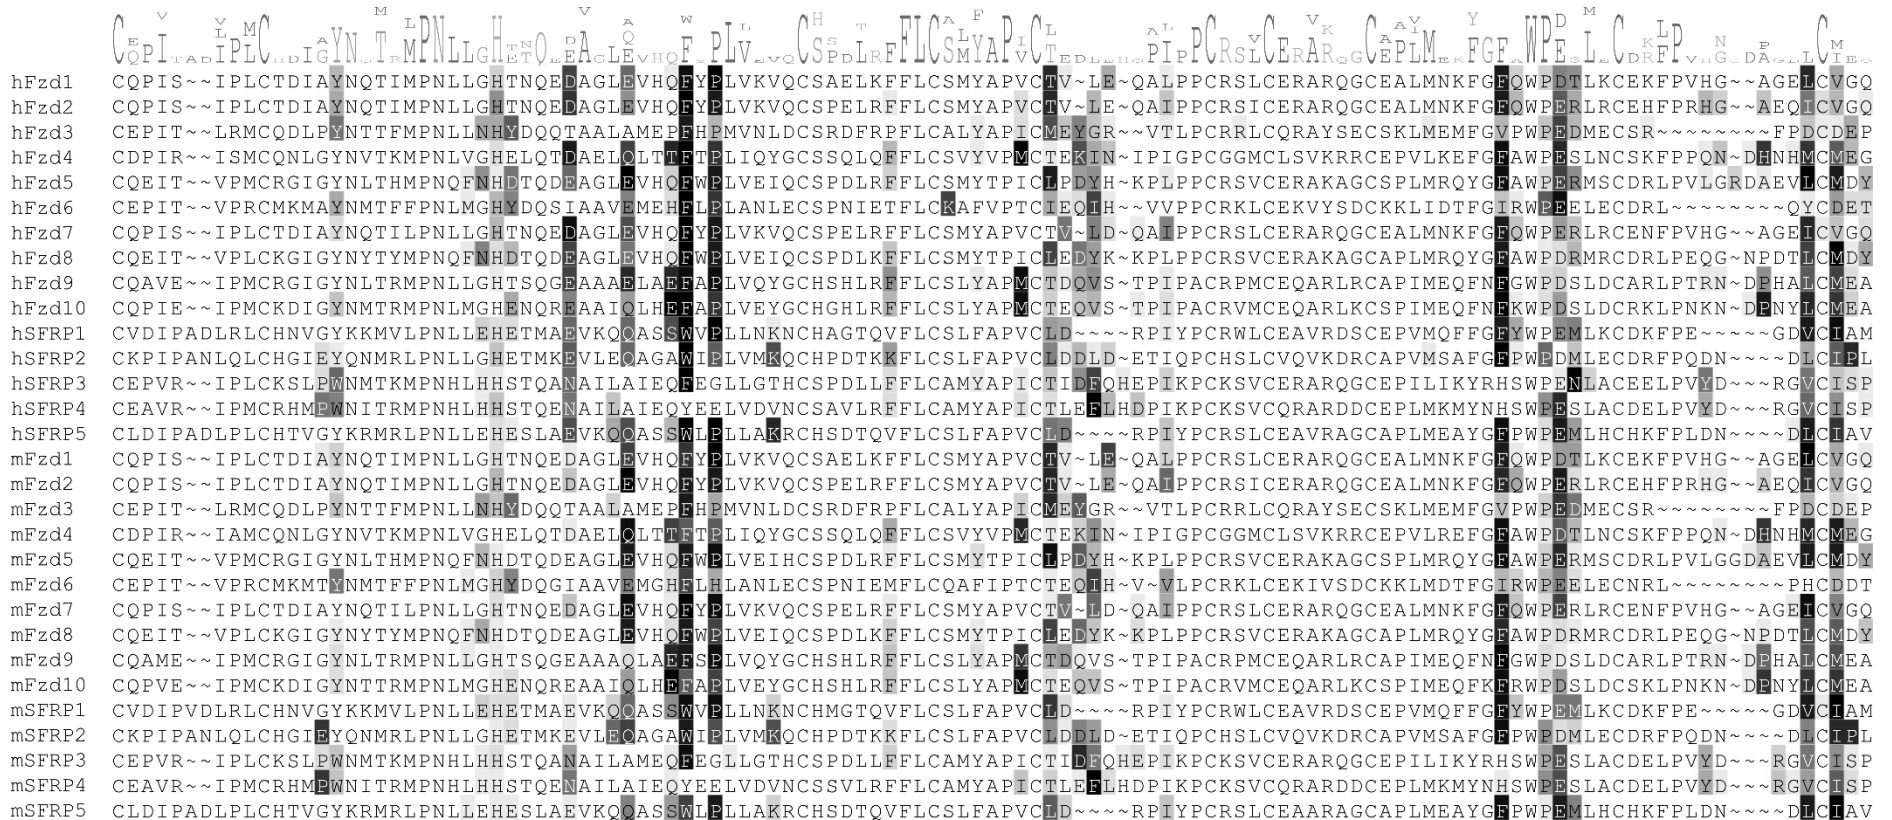

<sup>a</sup>Due to the involvement of selected residues approximately evenly distributed over the sequences, the entire Fzd CRD sequences are shown. Intensity of shading indicates number of Wnt-Fzd CRD complexes involving the specified Fzd CRD in which that residue is a significant contributor to the binding energy.

**Reference**

1. Dijksterhuis, J. P., Baljinnyam, B., Stanger, K., Sercan, H. O., Ji, Y., Andres, O., Rubin, J. S., Hannoush, R. N., and Schulte, G. (2015) Systematic mapping of WNT-FZD protein interactions reveals functional selectivity by distinct WNT-FZD pairs. *J. Biol. Chem.* **290**, 6789-6798
